# 1 An open, analysis-ready, and quality 2 controlled resource for pediatric 3 brain white-matter research

4 **Adam Richie-Halford<sup>1†\*</sup>, Matthew Cieslak<sup>2,3†\*</sup>, Lei Ai<sup>4</sup>, Sindy Caffarra<sup>1,5,6</sup>, Sydney  
5 Covitz<sup>2,3</sup>, Alexandre R. Franco<sup>4,7</sup>, Iliana I. Karipidis<sup>5,8,9</sup>, John Kruper<sup>10</sup>, Michael  
6 Milham<sup>4,7</sup>, Bárbara Avelar-Pereira<sup>8</sup>, Ethan Roy<sup>5</sup>, Valerie J. Sydnor<sup>2,3</sup>, Jason  
7 Yeatman<sup>1,5</sup>, The Fibr Community Science Consortium<sup>12</sup>, Theodore D.  
8 Satterthwaite<sup>2,3‡</sup>, Ariel Rokem<sup>10,11‡</sup>**

**\*For correspondence:**

[adamrh@stanford.edu](mailto:adamrh@stanford.edu) (ARH);  
[matthew.cieslak@penncmedicine.  
upenn.edu](mailto:matthew.cieslak@penncmedicine.upenn.edu) (MC)

<sup>†</sup>These authors contributed  
equally to this work

<sup>‡</sup>These authors also contributed  
equally to this work

9 <sup>1</sup>Stanford University, Division of Developmental and Behavioral Pediatrics, Stanford,  
10 California, 94305, USA; <sup>2</sup>University of Pennsylvania, Department of Psychiatry,  
11 Philadelphia, Pennsylvania, 19104, USA; <sup>3</sup>University of Pennsylvania, Lifespan  
12 Informatics and Neuroimaging Center, Philadelphia, Pennsylvania, 19104, USA; <sup>4</sup>Child  
13 Mind Institute, Center for the Developing Brain, New York City, New York, 10022, USA;  
14 <sup>5</sup>Stanford University, Graduate School of Education, Stanford, California, 94305, USA;  
15 <sup>6</sup>University of Modena and Reggio Emilia, Department of Biomedical, Metabolic and  
16 Neural Sciences, 41125 Modena, Italy; <sup>7</sup>Nathan Kline Institute for Psychiatric Research,  
17 Center for Biomedical Imaging and Neuromodulation, Orangeburg, New York, 10962,  
18 USA; <sup>8</sup>Stanford University, Department of Psychiatry and Behavioral Sciences, School of  
19 Medicine, Stanford, California, 94305, USA; <sup>9</sup>University of Zurich, Department of Child  
20 and Adolescent Psychiatry and Psychotherapy, University Hospital of Psychiatry Zurich,  
21 Zurich, 8032, Switzerland; <sup>10</sup>University of Washington, Department of Psychology,  
22 Seattle, Washington, 98195, USA; <sup>11</sup>University of Washington, eScience Institute, Seattle,  
23 Washington, 98195, USA; <sup>12</sup>The Fibr Community Science Consortium

24

## 25 **Abstract**

26 We created resources to facilitate research on the role of human brain microstructure in the  
27 development of mental health disorders, based on openly-available diffusion MRI (dMRI) data  
28 from the Healthy Brain Network (HBN) study. First, we curated the HBN dMRI data (N=2747) into  
29 the Brain Imaging Data Structure and preprocessed it according to best-practices, including  
30 denoising and correcting for motion effects, susceptibility-related distortions, and eddy currents.  
31 Preprocessed, analysis-ready data was made openly available. Data quality plays a key role in the  
32 analysis of dMRI, and we provide automated quality control (QC) scores for every scan, as part of  
33 the data release. To scale QC to this large dataset, we trained a neural network through the  
34 combination of a small data subset scored by experts and a larger set scored by community  
35 scientists. The network performs QC highly concordant with that of experts on a held out set  
36 (ROC-AUC = 0.947). A further analysis of the neural network demonstrates that it relies on image  
37 features with relevance to QC. Altogether, this work both delivers a resource for transdiagnostic  
38 research in brain connectivity and pediatric mental health and serves as a novel tool for  
39 automated QC of large datasets.

40

## 41 Introduction

42 Childhood and adolescence are characterized by rapid dynamic change to human brain structure  
43 and function (*Lebel and Deoni, 2018*). This period of development is also a time during which the  
44 symptoms of many mental health disorders emerge (*Paus et al., 2008*). Understanding how indi-  
45 vidual differences in brain development relate to the onset and progression of psychopathology  
46 inevitably requires large datasets (*Paus, 2010; Fair et al., 2021*). The Healthy Brain Network (HBN)  
47 is a landmark pediatric mental health study that is designed to eventually include MRI images along  
48 with detailed clinical and cognitive phenotyping from over 5000 New York City area children and  
49 adolescents (*Alexander et al., 2017*). The HBN dataset takes a trans-diagnostic approach and pro-  
50 vides a broad range of phenotypic and brain imaging data for each individual. One of the brain  
51 imaging measurements acquired is diffusion MRI (dMRI), which is the dominant technology for in-  
52 ferring the physical properties of white matter (*Wandell, 2016*). The dMRI data is openly available  
53 in its raw form through the Functional Connectomes Project and the International Neuroimag-  
54 ing Data-Sharing Initiative (FCP-INDI), spurring collaboration on open and reproducible science  
55 (*Mennes et al., 2013*). However, this raw, publicly available data requires extensive processing  
56 and quality assurance before it can be fruitfully analyzed.

57 The analysis of a large, multi-site dMRI dataset must take into account the inevitable variability  
58 in scanning parameters across scanning sessions. Critical preprocessing steps, such as susceptibil-  
59 ity distortion correction (*Jones and Cercignani, 2010*) require additional MRI acquisitions besides  
60 dMRI and accurate metadata accompanying each image. A session missing an acquisition or impor-  
61 tant metadata can either be processed to the extent its available data allows or excluded entirely. In  
62 addition, the quality of preprocessed data is heavily affected by differences in acquisition param-  
63 eters (*Yeh et al., 2019*) and by differences in preprocessing steps. Here we address these problems  
64 by meticulously curating the HBN data according to the Brain Imaging Data Specification (BIDS)  
65 (*Gorgolewski et al., 2016*) and processing the data using the *QSIPrep* (*Cieslak et al., 2021*) BIDS App  
66 (*Gorgolewski et al., 2017*). *QSIPrep* automatically builds and executes benchmarked workflows that  
67 adhere to best practices in the field given the available BIDS data. The results include automated  
68 data quality metrics, visual reports and a description of the processing steps automatically chosen  
69 to process each session.

70 This preprocessing requires a costly compute infrastructure and is both time-consuming and  
71 error-prone. Requiring researchers to process dMRI data on their own introduces both a practical  
72 barrier to access and an extra source of heterogeneity into the data, devaluing its scientific utility.  
73 We provide the preprocessed data as a transparent and open resource, thereby reducing barriers  
74 to data access and allowing researchers to spend more of their time answering questions in brain  
75 development and psychopathology rather than recapitulating preprocessing.

76 In addition to requiring extensive preprocessing, dMRI data must be thoroughly checked for  
77 quality. dMRI measurements are susceptible to a variety of artifacts that affect the quality of the  
78 signals and the ability to make accurate inferences from them. In small studies, with few partic-  
79 ipants, it is common to thoroughly examine the data from every participant as part of a quality  
80 control (QC) process. However, expert examination is time consuming and is prohibitive in large  
81 datasets such as HBN. This difficulty could be ameliorated through the automation of QC. Given  
82 their success in other visual recognition tasks, machine learning and computer vision methods,  
83 such as convolutional deep artificial neural networks or “deep learning” (*LeCun et al., 2015*), are  
84 promising avenues for automation of QC. However, one of the challenges of these new methods  
85 is that they require a large training dataset to attain accurate performance. In previous work, we  
86 demonstrated that deep learning can accurately emulate expert QC of T1-weighted (T1w) anatom-  
87 ical brain images (*Keshavan et al., 2019*). To obtain a large enough training dataset of T1w images  
88 in our prior study, we deployed a community science tool<sup>1</sup> that collected quality control scores of

<sup>1</sup>While the term “citizen science” evokes a sense of civic duty in scientific engagement, it can also imply a barrier for com-  
munity members who want to contribute to science but may not be citizens of a particular country. In this manuscript we use  
the more modern term “community science.”

89 parts of the dataset from volunteers through a web application. The scores were then calibrated  
90 using a gold standard expert-scored subset of these images. A deep learning neural network was  
91 trained on the calibrated and aggregated score, resulting in very high concordance with expert  
92 ratings on a separate test dataset. We termed this approach “hybrid QC”, because it combined in-  
93 formation from experts with information from community scientists to create a scalable machine  
94 learning algorithm that can be applied to future data collection.

95 However, the hybrid QC proof-of-concept left lingering questions about its applicability to other  
96 datasets because it was trained on a single-site, single-modality dataset. Here, we expand the  
97 hybrid-QC approach to a large multi-site dMRI dataset. Moreover, one of the common critiques of  
98 deep learning is that it can learn irrelevant features of the data and does not provide information  
99 that is transparent enough to interpret (*Lipton, 2017; Salahuddin et al., 2022; Zech et al., 2018*).  
100 To confirm that the hybrid-QC deep learning algorithm uses meaningful features of the diffusion-  
101 weighted images (DWI) to perform accurate QC, we used machine learning interpretation methods  
102 that pry open the “black box” of the neural network, thereby highlighting the features that lead to  
103 a specific QC score (*Sundararajan et al., 2017; Murdoch et al., 2019*).

104 Taken together, the combination of curated BIDS data, preprocessed images, and quality con-  
105 trol scores generated by the deep learning algorithm provides researchers with a rich and acces-  
106 sible data resource. We anticipate that these HBN Preprocessed Open Diffusion Derivatives (HBN-  
107 POD2) will accelerate translational research on both normal and abnormal brain development.

## 108 Results

109 The aims of this study were fourfold: (i) curate the HBN MRI data into a fully BIDS-compliant MRI  
110 dataset, (ii) perform state-of-the-art diffusion MRI (dMRI) preprocessing using *QSIprep*, (iii) assign  
111 QC scores to each participant, and (iv) provide unrestricted public release to the outputs from  
112 each of these steps. We started with MRI data from 2747 HBN participants available through FCP-  
113 INDI, curating these data for compliance with the Brain Imaging Data Structure (BIDS) specification  
114 (*Gorgolewski et al., 2016*). We preprocessed the structural MRI (sMRI) and diffusion MRI (dMRI)  
115 data using *QSIprep*. Participants that could not be curated to comply with the BIDS standard or  
116 that did not have dMRI data were excluded, resulting in 2134 participants with preprocessed, BIDS-  
117 compliant dMRI data (Figure 1). HBN neuroimaging data was collected at four sites: Staten Island  
118 (SI,  $N = 300$ ), Rutgers University Brain Imaging Center (RU,  $N = 873$ ), the CitiGroup Cornell Brain  
119 Imaging Center (CBIC,  $N = 887$ ), and the City University of New York Advanced Science Research  
120 Center (CUNY,  $N = 74$ ), where numbers in parentheses represent participant counts in HBN-POD2.  
121 Figure 2 depicts the age distribution of study participants by sex for each of these scan site as well  
122 as pairwise distributions for the automated quality metrics that are described in the next section.

### 123 Healthy Brain Network Preprocessed Open Diffusion Derivatives

124 Curated BIDS data and their corresponding *QSIprep* outputs are provided in the FCP-INDI Amazon  
125 Web Services (AWS) S3 bucket <sup>2</sup>. This public resource can be accessed by anyone using standard  
126 S3 access tools.

127 The curation process accounts for the acquisition variability inherent in large multi-site datasets  
128 by identifying unique *variants* in the HBN dMRI and fieldmap acquisitions. Each session was grouped  
129 according to metadata parameters that affect the dMRI signal (PhaseEncodingDirection, EchoTime,  
130 VoxelSize, FlipAngle, PhasePartialFourier, NumberOfVolumes, Fieldmap availability). Using the “Cu-  
131 ration of BIDS” (CuBIDS) package (*Covitz et al., 2022*), we identified a total of 20 unique DWI acqui-  
132 sitions across HBN-POD2, where about 5% of acquisitions were different from the most common  
133 DWI acquisition at their site. The specific variant of each session is provided as a column in the  
134 participant.tsv file and a summary of variants with participant counts is provided in Appendix 1.

<sup>2</sup>Curated BIDS data is available at [s3://fcp-indi/data/Projects/HBN/BIDS\\_curated/](s3://fcp-indi/data/Projects/HBN/BIDS_curated/) and *QSIprep* outputs are available at [s3://fcp-indi/data/Projects/HBN/BIDS\\_curated/derivatives/qsiprep/](s3://fcp-indi/data/Projects/HBN/BIDS_curated/derivatives/qsiprep/).

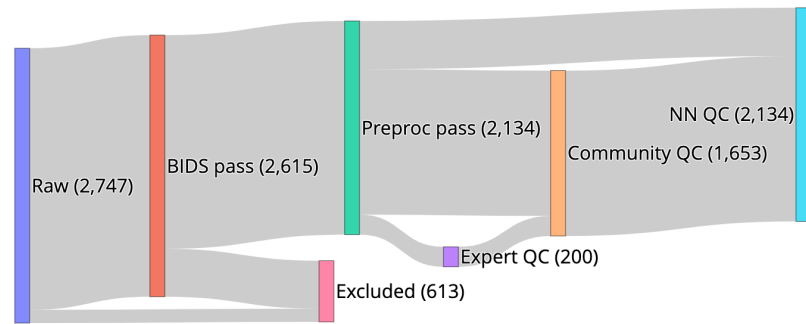

**Figure 1. HBN-POD2 data provenance:** Imaging data for 2747 participants, aged 5-21 years and collected at four sites in the New York City area, was made available through the Functional Connectomes Project and the International Neuroimaging Data-Sharing Initiative (FCP-INDI). These data were curated for compliance to the BIDS specification ([Gorgolewski et al., 2016](#)) and availability of imaging metadata in json format. 2615 participants met this specification. Imaging data was preprocessed using *QSIPrep* ([Cieslak et al., 2021](#)) to group, distortion correct, motion correct, denoise, coregister and resample MRI scans. Of the BIDS curated participants, 2134 passed this step, with the majority of failures coming from participants with missing dMRI scans. Expert raters assigned QC scores to 200 of these participants, creating a “gold standard” QC subset. Community raters then assigned binary QC ratings to a superset of the gold standard containing 1653 participants. An image classification algorithm was trained on a combination of automated quality metrics from *QSIPrep* and community scientist reviews to “extend” the expert ratings to the community science subset. Finally, a deep learning QC model was trained on the community science subset to assign QC scores to the entire dataset and to future releases from HBN. The HBN-POD2 dataset, including QC ratings, is openly available through FCP-INDI.

135 The processed diffusion derivatives are [standard \*QSIPrep\* outputs](#), which contain preprocessed  
136 imaging data along with the corresponding QC metrics:

- 137 • **Anatomical Data** Preprocessed images, segmentations and transforms for spatial normaliza-  
138 tion are located in the `anat/` directory of each session. The gray matter, white matter and  
139 cerebrospinal fluid (GM, WM, CSF) probabilistic segmentations are provided in nifti format with  
140 the `_probtissue` suffix. The deterministic segmentation is in `_dseg.nii.gz`. All images are  
141 in alignment with AC-PC-aligned `sub-X_desc-preproc_T1w.nii.gz` image unless they have  
142 `space-MNI152NLin2009cAsym` in their file name, in which case they are aligned to the MNI  
143 Nonlinear T1-weighted asymmetric brain template (version 2009c; ([Fonov et al., 2009a](#))). The  
144 spatial transform between the AC-PC T1w image and the MNI space brain is in the ITK/ANTs  
145 format file named `sub-X_from-MNI152NLin2009cAsym_to-T1w_mode-image_xfm.h5`. The brain  
146 mask from `ANTsBrainExtraction.sh` is included in the file with the `_desc-brain_mask.nii.gz`  
147 suffix.
- 148 • **Diffusion Data** The preprocessed dMRI scan and accompanying metadata are located in the  
149 `dwi/` directory of each session. The fully-preprocessed dMRI data is named according to the  
150 file pattern `sub-X_space-T1w_desc-preproc_dwi.nii.gz`. These images all have an isotropic  
151 voxel size of 1.7 mm and are aligned in world coordinates with the anatomical image located  
152 at `anat/sub-X_desc-preproc_T1w.nii.gz`. Gradient information is provided in `bval/bvec` for-  
153 mat compatible with DIPY and DSI Studio and the `.b` format compatible with MRtrix3. Volume-  
154 wise QC metrics including head motion parameters are included in the `confounds.tsv` file.  
155 Automatically computed quality measures for the entire image series are provided in the  
156 `ImageQC.csv` file, which includes the neighboring DWI Correlation, number of bad slices and  
157 head motion summary statistics. Figure 2 depicts pairwise distributions for the three of these  
158 automated data quality metrics that were most informative in QC models described later (see  
159 Appendix 3 for further details). The `desc-brain_mask` file is a dMRI-based brain mask that  
160 should only be used when the T1w-based brain mask is inappropriate (i.e. when no suscep-  
161 tibility distortion correction has been applied).

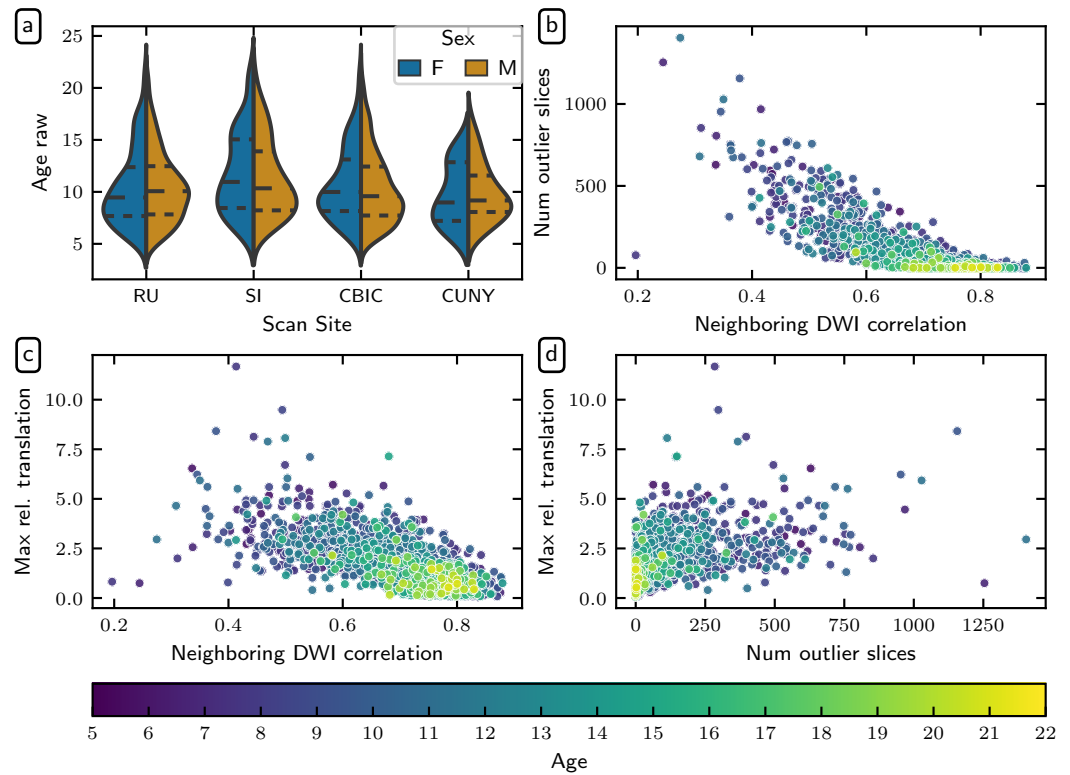

**Figure 2. Demographic and QSIprep quality metric distributions:** (a) HBN age distributions by sex for each scanning site. Dashed lines indicate age quartiles. The remaining plots show associations between (b) neighboring diffusion-weighted imaging (DWI) correlation (Yeh *et al.*, 2019) and the number of outlier slices, (c) neighboring DWI correlation and maximum relative translation, and (d) the number of outlier slices and maximum relative translation. The number of outlier slices is positively associated with the maximum relative translation, while neighboring DWI correlation is negatively associated with the other two metrics. These plots are colored by age, and reveal that older participants generally have higher quality data.

## 162 Quality Control

163 To QC all available HBN dMRI data, we adopted a hybrid QC approach that combines expert rating,  
 164 community science, and deep learning, drawing on the success of a previous application in assess-  
 165 ing the quality of HBN's structural T1w MRI data (Keshavan *et al.*, 2019). This method (i) starts with  
 166 dMRI expert raters labelling a small subset of participants, the "gold standard" dataset; (ii) ampli-  
 167 fies these labels using a community science web application to extend expert ratings to a much  
 168 larger subset of the data, the community science subset and (iii) trains a deep learning model on  
 169 the community science subset to predict expert decisions on the entire dataset.

## 170 Expert quality control

171 To create a gold standard QC dataset, we first developed *dmriprep-viewer*, a dMRI data viewer and  
 172 QC rating web application to display QSIprep outputs and collect expert ratings (Richie-Halford  
 173 *et al.*, 2022). Six of the co-authors, who are all dMRI experts, rated a 200-participant subset of the  
 174 HBN-POD2 data using extensive visual examination of each participant's dMRI data, including the  
 175 preprocessed diffusion weighting imaging (DWI) time series, a plot of motion parameters through-  
 176 out the DWI scan, and full 3D volumes depicting (i) the brain mask and  $b = 0$  to T1w registration and  
 177 (ii) a directionally encoded color fractional anisotropy (DEC-FA) image laid over the  $b = 0$  volume.  
 178 See Appendix 2 for an example of the *dmriprep-viewer* interface. The experts rated participants  
 179 using a five-point scale with ratings of "definitely fail," "probably fail," "not sure," "probably pass,"  
 180 and "definitely pass." The distribution of scores given by the experts demonstrates that the gold



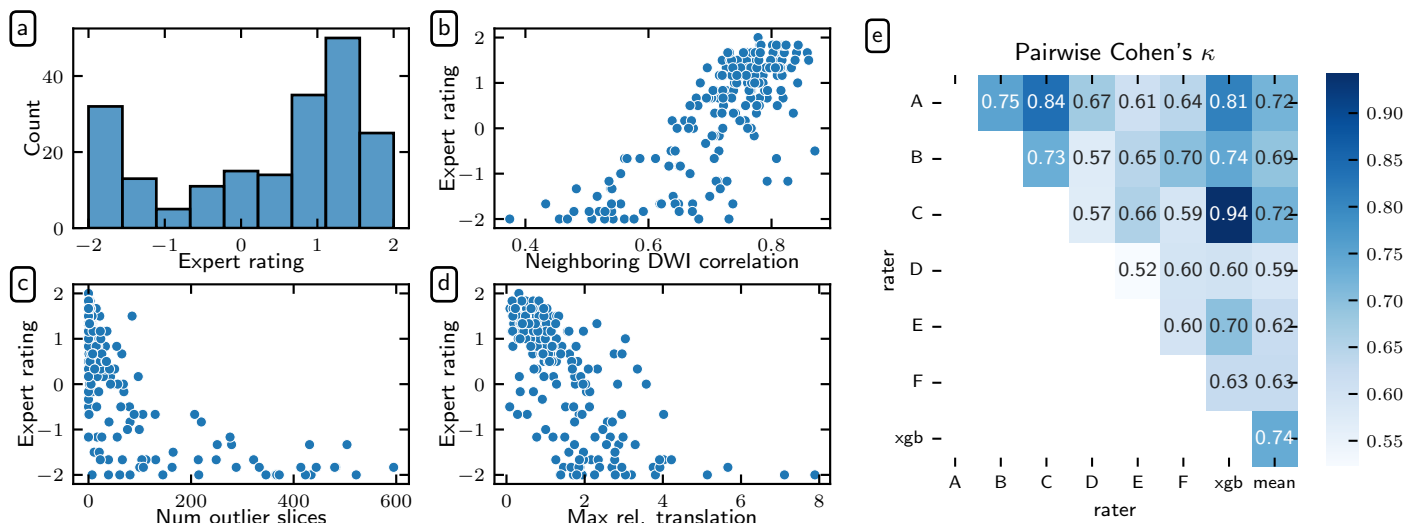

**Figure 3. Expert QC results:** Six dMRI experts rated a subset of 200 participants. Experts agreed with *QSIPrep*'s automated QC metrics. Here we show the distribution of mean expert QC ratings (a) and associations between the mean expert QC rating and the *QSIPrep* metrics (b) neighboring diffusion-weighted imaging (DWI) correlation (Yeh et al., 2019), (c) maximum relative translation, and (d) number of outlier slices. As expected, neighboring DWI correlation is directly correlated with expert rating while the other two metrics are inversely correlated with expert rating. (e) Experts agreed with each other. Here we show the pairwise Cohen's  $\kappa$  measure of inter-rater reliability (see text for ICC calculations). The XGB model has an inter-rater reliability (quantified here as Cohen's  $\kappa$ ) that is indistinguishable from the other raters

181 standard dataset included a range of data quality (Figure 3a). Mean expert ratings correlated with  
 182 the three *QSIPrep* automated QC metrics that were most informative for the XGB model described  
 183 in the next section: neighboring DWI correlation (Yeh et al., 2019) (Figure 3b), maximum relative  
 184 translation (Figure 3c), and number of outlier slices (Figure 3d). The neighboring DWI correlation  
 185 characterizes the pairwise spatial correlation between pairs of DWI volumes that sample neigh-  
 186 boring points in  $q$ -space. Since lower values indicate reduced data quality, it is reassuring that the  
 187 neighboring DWI correlation correlated directly with expert ratings (Pearson CC: 0.797). Conversely,  
 188 high relative translation and a high number of motion outlier slices reflect poor data quality and  
 189 these metrics were inversely related to mean expert rating (Pearson CC:  $-0.692$  and Pearson CC:  
 190  $-0.695$ , respectively).

191 In addition to agreeing qualitatively with *QSIPrep*'s automated QC metrics on average, the expert  
 192 raters also tended to agree with each other (Figure 3e). We assessed inter-rater reliability (IRR)  
 193 using the pairwise Cohen's  $\kappa$  (Di Eugenio and Glass, 2004), which exceeded 0.52 in all cases, and  
 194 with a mean value of 0.648. In addition to the pairwise Cohen's  $\kappa$ , we also computed the intra-class  
 195 correlation (ICC) (Hallgren, 2012) as a measure of IRR. ICC3k is the appropriate variant of the ICC to  
 196 use when a fixed set of  $k$  raters each code an identical set of participants, as is the case here. ICC3k  
 197 for inter-rater reliability among the experts was 0.930 (95% CI: [0.91, 0.94]), which is qualitatively  
 198 considered an "excellent" level of IRR (Cicchetti, 1994). The high IRR provides confidence that the  
 199 average of the expert ratings for each image in the gold standard is an appropriate target to use  
 200 for training a machine learning model that predicts the expert scores.

### 201 Community science quality control

202 Although the expert raters achieved high IRR and yielded intuitive associations with *QSIPrep*'s au-  
 203 tomated QC metrics, generating expert QC labels for the entire HBN-POD2 dataset would be pro-  
 204 hibitively time consuming. To assess the image quality of the remaining participants, we deployed  
 205 *Fibr* (<https://fibr.dev>), a community science web application in which users assigned binary pass/fail  
 206 labels assessing the quality of horizontal slice DEC-FA images overlaid on the  $b = 0$  image (see Ap-  
 207 pendix 2 for an example). Specifically, *Fibr* users saw individual slices or an animated sequence of

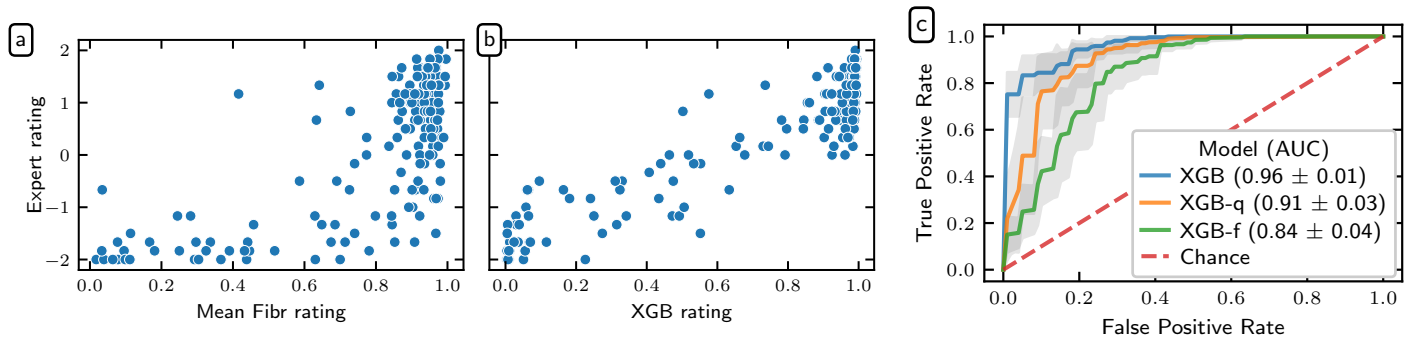

**Figure 4. Community science predictions of the expert ratings:** Scatter plots showing the relationship between mean expert rating and both mean *Fibr* rating (a) and XGB prediction (b). *Fibr* raters overestimated the quality of images compared to expert raters. But the XGB prediction compensated for this by incorporating automated QC metrics and weighting more valuable *Fibr* raters. (c) ROC curves for the XGB, XGB-q, and XGB-f models. Translucent bands represent one standard deviation from the mean of the cross-validation splits.

208 ten slices taken from the entire DEC-FA volume that the expert raters saw. The *Fibr* users, there-  
209 fore, saw only a subset of the imaging data that the dMRI experts had access to for a given partici-  
210 pant, but they saw data from many more participants. In total, 374 community scientists provided  
211 587,778 ratings for a mean of > 50 ratings per slice (or > 200 ratings per participant) from 1653 partici-  
212 pants. Of the community scientists, 145 raters provided > 3,000 ratings each and are included  
213 in the *Fibr* Community Science Consortium as co-authors on this paper (Ward-Fear et al., 2020)  
214 (see Appendix 4 for a list of consortium co-authors).

215 There are three issues to account for when comparing *Fibr* and expert QC ratings. First, the  
216 unadjusted *Fibr* ratings were overly optimistic; i.e., on average, community scientists were not as  
217 conservative as the expert raters (Figure 4a). Second, different community scientists provide data  
218 of differing accuracy. That is, they were less consistent across different views of the same image,  
219 and/or were less consistent with expert ratings for the same data). This means that data from some  
220 *Fibr* raters was more informative than others. Third, important information about data quality was  
221 provided in the *QSIPrep* data quality metrics, which were not available to *Fibr* raters. To account for  
222 rater variability and take advantage of the information provided by *QSIPrep*, we trained gradient  
223 boosted decision trees (Chen and Guestrin, 2016a) to predict expert scores, scaled to the range  
224 [0, 1] and binarized with a 0.5 threshold, based on a combination of community science ratings and  
225 automated *QSIPrep* QC metrics. One can think of the gradient boosting model as assigning more  
226 weight to *Fibr* raters who reliably agree with the expert raters, thereby resolving the aforesaid  
227 issues with community rater accuracy. We refer to this gradient boosting model as XGB.

228 To clarify the contributions of the automated QC metrics and the community science raters, we  
229 trained two additional gradient boosting models: (i) one trained only on the automated *QSIPrep*  
230 data quality metrics, which we call XGB-q and (ii) one trained on only the *Fibr* ratings, which we  
231 call XGB-f. XGB-f may be viewed as a data-driven weighting of community scientists' ratings, while  
232 XGB-q may be viewed as a generalization of data quality metric exclusion criteria. XGB, combining  
233 information from both *Fibr* ratings and *QSIPrep* data quality metrics attained a cross-validated area  
234 under the receiver operating curve (ROC-AUC) of  $0.96 \pm 0.01$  on the "gold standard," where the  $\pm$   
235 indicates the standard deviation of scores from repeated  $k$ -fold cross-validation (Figure 4b). In  
236 contrast, XGB-q attained an ROC-AUC of  $0.91 \pm 0.03$  and XGB-f achieved an ROC-AUC of  $0.84 \pm 0.04$ .  
237 The enhanced performance of XGB-q over XGB-f shows that community scientists alone are not as  
238 accurate as automated data quality metrics are at predicting expert ratings. And yet, the increased  
239 performance of XGB over XGB-q demonstrates that there is additional image quality information  
240 to be gained by incorporating community scientist input.

241 As a way of evaluating the quality of the XGB predictions, consider the fact that the average  
242 Cohen's  $\kappa$  between XGB and the expert raters was 0.74, which is higher than the average Cohen's

243  $\kappa$  between any of the other raters and their human peers (Figure 3). This is not surprising, given  
244 that the XGB model was fit to optimize this match, but further demonstrates the goodness of fit of  
245 this model.

246 Nevertheless, this provides confidence in using the XGB scores in the next step of analysis,  
247 where we treat the XGB model as an additional coder and extend XGB ratings to participants with-  
248 out *Fibr* ratings. In this case, when a subset of participants is coded by multiple raters and the  
249 reliability of their ratings is meant to generalize to other participants rated by only one coder, the  
250 single-measure ICC3, as opposed to ICC3k, should be used. When adding XGB to the existing expert  
251 raters as a seventh expert, we achieved **ICC3** = 0.709(95%CI : [0.66, 0.75]). The high ICC3 value after  
252 inclusion of the XGB model justifies using the XGB scores as the target for training an image-based  
253 deep learning network.

#### 254 Automated quality control labelling through deep learning

255 While the XGB “rater” does a good job of extending QC ratings to the entire community science  
256 subset, this approach requires *Fibr* scores; without community science *Fibr* scores, only the less  
257 accurate XGB-q prediction can be employed. Consequently, a new, fully automated QC approach  
258 is needed that can be readily applied to new data releases from HBN.

259 We therefore trained a deep convolutional neural network to predict the XGB ratings directly  
260 from *QSIPrep* outputs. We modified an existing 3D convolutional neural network (CNN) architec-  
261 ture (*Zunair et al., 2020*)—previously applied to the ImageCLEF Tuberculosis Severity Assessment  
262 2019 benchmark (*Dicente Cid et al., 2019*)—to accept multichannel input generated from the pre-  
263 processed dMRI: the  $b = 0$  reference diffusion image, each of the three cardinal axis components  
264 of the DEC-FA image, and, optionally, automated QC metrics from *QSIPrep*. We trained this net-  
265 work on XGB scores and validated it against the gold standard expert-scored dataset. We refer  
266 to the convolutional neural network model trained only on imaging data as CNN-i and the model  
267 that incorporates automated QC metrics as CNN-i+q. The two models performed nearly identically  
268 and achieved an ROC-AUC of  $0.947 \pm 0.004$  (Figure 5a). The near-identical performance suggests  
269 that *QSIPrep*’s automated data quality metrics provided information that was redundant with in-  
270 formation available in the imaging data. Both CNN-i and CNN-i+q outperformed XGB-q, which was  
271 trained only on automated QC metrics, but both modestly underperformed relative to the full XGB  
272 model, that uses *Fibr* scores in addition to the *QSIPrep* data quality metrics.

273 The openly available HBN-POD2 data released with this paper provides four QC ratings: the  
274 mean expert QC ratings, XGB-q and XGB predicted scores, as well as the CNN-i predicted score.  
275 However, we treat the CNN-i score as the definitive QC score because it is available for all partici-  
276 pants, can be easily calculated for new participants in future HBN releases, and is more accurate  
277 than XGB-q in predicting expert ratings in the “gold standard” report set. When we refer to a par-  
278 ticipant’s QC score without specifying a generating model, the CNN-i score is assumed. Figure 5  
279 depicts the distribution of these QC scores by age (Figure 5b), sex (Figure 5c), and scanning site  
280 (Figure 5d). QC distributions are similar for each scan site and for male and female participants<sup>3</sup>.

#### 281 Attribution masks for the deep learning classifier

282 We generated post-hoc attribution maps that highlight regions of the input volume that are rele-  
283 vant for the QC score. The integrated gradient method (*Sundararajan et al., 2017*) is a gradient-  
284 based attribution method (*Ancona et al., 2019*) that aggregates gradients for synthetic images in-  
285 terpolating between a baseline image and the input image. It has been used to interpret deep  
286 learning models applied to retinal imaging in diabetic retinopathy (*Sayres et al., 2019*) and glau-  
287 coma (*Mehta et al., 2021*) prediction, as well as in multiple sclerosis prediction from brain MRI  
288 (*Wagnier-Dauchelle et al., 2021*). Our goal is to confirm that the CNN-i model was driven by the  
289 same features that would drive the expert rating, thereby bolstering the decision to apply it to new  
290 data.

<sup>3</sup>Responses for the sex variable in HBN phenotypic data are limited to “male” and “female.”



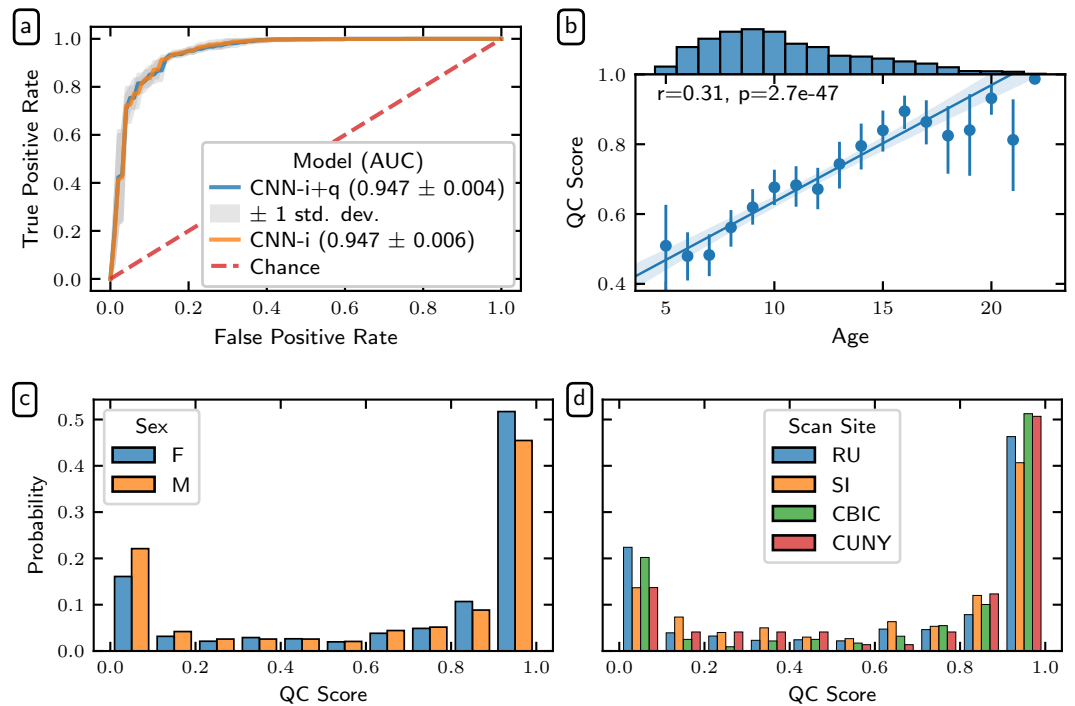

**Figure 5. Deep learning QC scores:** (a) ROC curves for two deep learning models trained on imaging data: one trained with additional automated data quality metrics from *QSIPrep* (blue) and one trained without (orange). The models performed roughly identically, reflecting that the data quality metrics are derived from the imaging data and are therefore redundant. Both outperformed the XGB-q predictions, indicating the added value of the diffusion weighted images. However, both models underperformed the XGB predictions, which also incorporate information from *Fibr* ratings for each scan. The error bands represent one standard deviation from the mean of the cross-validation splits. (b) Joint distributions showing a strong direct association between age and QC score (Pearson CC: 0.31). This likely reflects the well-known negative association between age and head motion in pediatric neuroimaging. The dots encode the mean QC score for each year of age with error bands representing a bootstrapped 95% confidence interval. The line depicts a linear regression relating age and QC score with translucent bands encoding a bootstrapped 95% confidence interval. Histograms showing the relationship between participants QC scores and their sex (c) and scan site (d). QC distributions are independent of sex and scanning site.

291 Figure 6 shows attribution maps for example participants from each confusion class: true positive  
 292 positive, true negative, false positive, and false negative. The columns correspond to the different  
 293 channels of the deep learning input volume: the  $b = 0$  reference image and the DEC-FA in the  $x$ ,  
 294  $y$ , and  $z$  directions. The blue voxels indicate positive attribution, that is, data that supports a passing  
 295 QC classification. Conversely, the red voxels indicate negative attribution, data that supports  
 296 a failing QC classification. The true positive map indicates that the network was looking at the  
 297 entire brain rather than focusing on any one anatomical region (Figure 6a). Moreover, the model  
 298 identified white matter fascicles that travel along the direction of the input channel: lateral for  $x$ ,  
 299 anterior-posterior for  $y$ , and superior-inferior for  $z$ . The true negative attribution map (Figure 6b)  
 300 reveals that when the reference  $b = 0$  volume contains motion artifacts, such as banding, the network  
 301 ignored the otherwise positive attributions for the clearly identifiable white matter tracts in  
 302 the DEC-FA channels. The false positive map (Figure 6c) and the false negative map (Figure 6d)  
 303 should be interpreted differently since they come from low confidence predictions; the probability  
 304 of passing hovered on either side of the pass/fail threshold. For example, in the false positive  
 305 case, the network was confused enough that it treated voxels that are outside of the brain to be  
 306 as informative as voxels in the major white matter bundles.

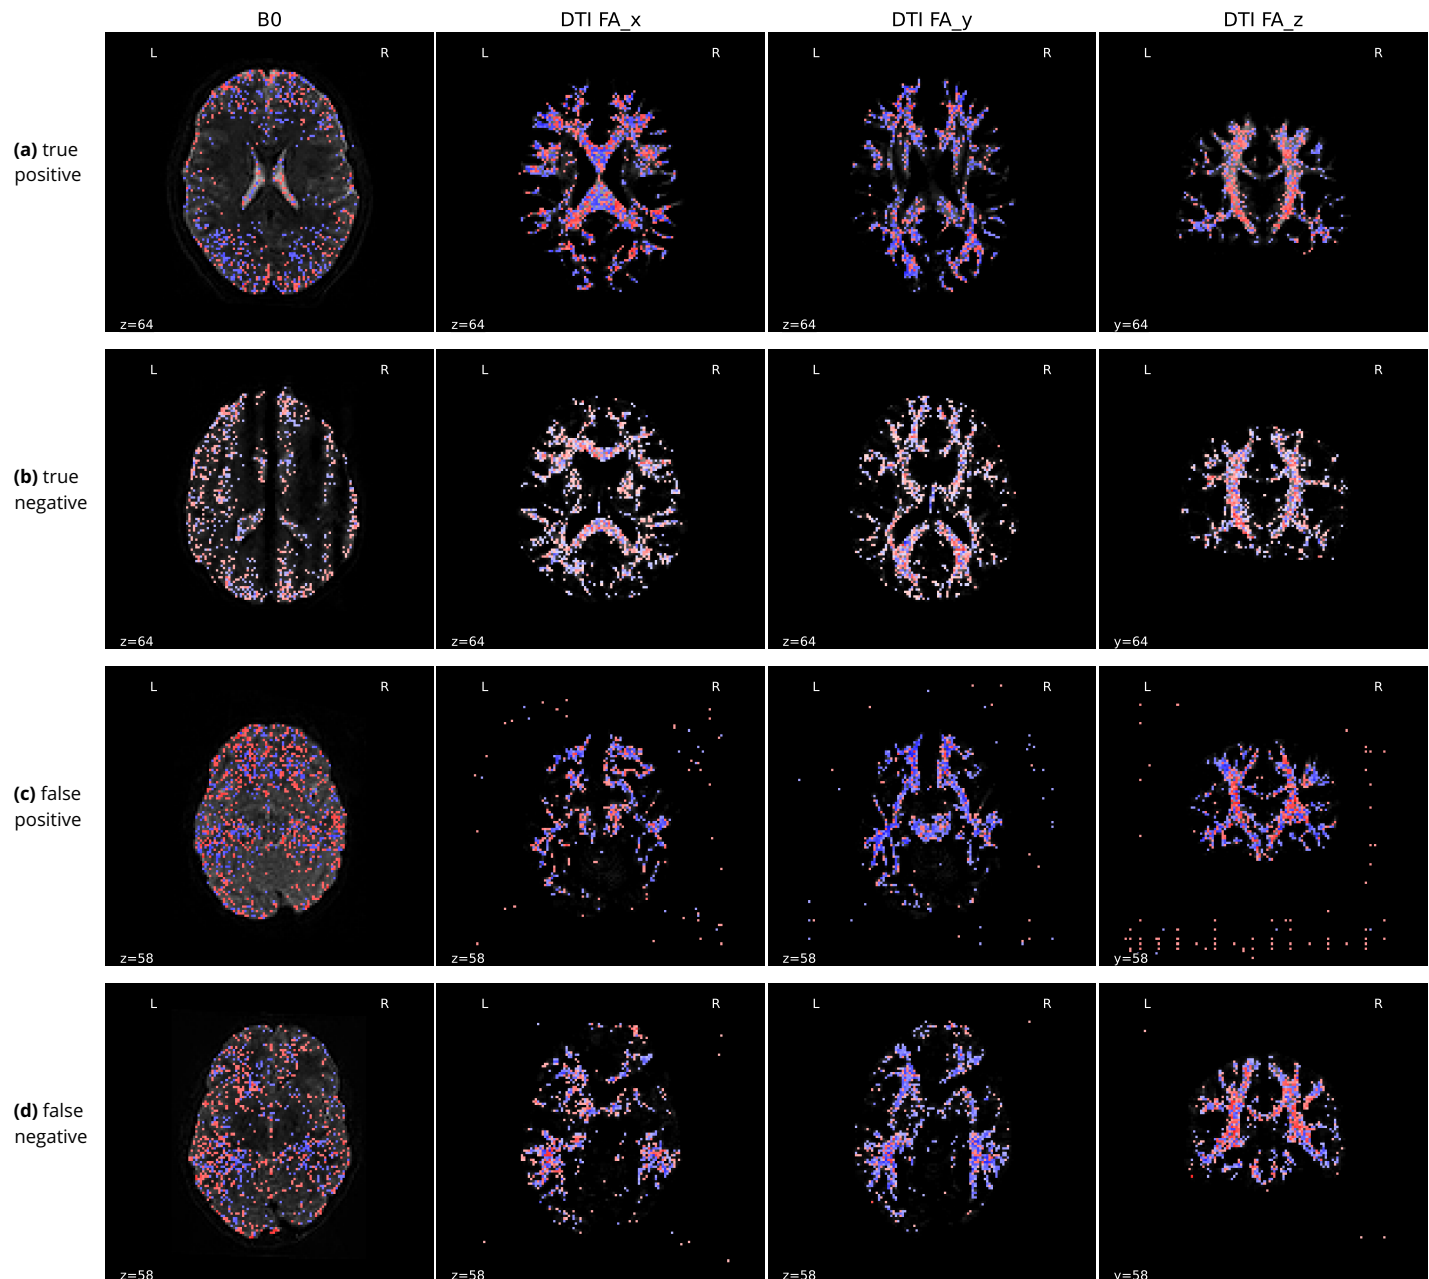

**Figure 6. Integrated gradients attribution maps for the deep learning classifier:** Each column depicts a different channel of the input tensor: the  $b = 0$  DWI volume and the DEC-FA images in the  $x$ ,  $y$ , and  $z$  directions. The first three columns show an axial slice while the last column shows a coronal slice. Blue voxels indicate positive attribution (i.e. evidence for passing the participant), while red voxels indicate negative attribution (i.e. evidence for QC failure). The underlying grayscale depicts the input channel. Each row depicts a representative participant from each confusion class: **(a)** Attribution maps for a true positive prediction. The model looked at the entire brain and focused on known white matter bundles in the DEC-FA channels. In particular, it focused on lateral bundles in the  $x$  direction, anterior-posterior bundles in the  $y$  direction, and superior-inferior bundles in the  $z$  direction. **(b)** Attribution maps for a true negative prediction. The model focused primarily on the  $b = 0$  channel, suggesting that it ignores DEC-FA when motion artifacts like banding are present. **(c)** Attribution maps for a false positive prediction. Both the false positive and negative predictions were low confidence predictions. This is reinforced by the fact that the model viewed some voxels that are outside of the brain as just as informative as those in major white matter tracts. **(d)** Attribution maps for a false negative prediction. The model failed to find long-range white matter tracts in the anterior-posterior and lateral directions. We also speculate that the model expected left-right symmetry in the DEC-FA channels and assigned negative attribution to asymmetrical features.

307 QC prediction models can generalize to unseen sites

308 Site harmonization is a major issue for any multisite neuroimaging study and developing auto-  
309 mated QC tools that generalize between sites has been a perennial issue (*Esteban et al., 2017*).  
310 Furthermore, the ability to generalize between sites in a single multisite study would signal the  
311 promise of generalizing to other datasets altogether. To better understand the ability of our QC  
312 models to generalize across scanning sites, we trained several variants of the XGB-q and CNN-i  
313 models on partitions of the data with different sites held out (Figure 7). ROC-AUC for generalization  
314 is uniformly high for both the XGB-q and the CNN-i models (Table 1). However, more importantly,  
315 accuracy and balanced accuracy vary substantially: depending on the site that was used for train-  
316 ing, balanced accuracy could be as low as guess rate, particularly for the CNN-i model. Notably,  
317 it seems that including the RU site in the training data led to relatively high balanced accuracy in  
318 both models. The XGB-q model balanced accuracy was less dependent on the specific sites used  
319 for training, but also displayed some variability across permutations of this experiment. In partic-  
320 ular, the benefit from including the “right site” in the training data, namely RU, eclipsed the slight  
321 benefit conferred by including more than one site in the training data.

### 322 Quality control improves inference

323 To demonstrate the effect that quality control has on inference, we analyzed tract profile data  
324 derived from HBN-POD2 data. Tract profiling (*Yeatman et al., 2012; Jones et al., 2005; Colby et al.,*  
325 *2012; O'Donnell et al., 2009; Kruper et al., 2021*) is a subset of tractometry (*Jones et al., 2005; Bells*  
326 *et al., 2011*), which uses the results of dMRI tractography to quantify properties of the white matter  
327 along major pathways. Tract-profiling retains the values of diffusion metrics along the trajectory of  
328 each bundle of tractography streamlines, rather than computing summary statistics summarized  
329 at the level of each bundle. In Figure 8, we plot mean diffusivity tract profiles grouped into four QC  
330 bins along the length of twenty-four bundles: While some bundles, such as the cingulum cingulate  
331 (CGC) and the inferior longitudinal fasciculus (ILF), appear insensitive to QC score, others, such  
332 as the uncinate (UNC) and the orbital portion of the corpus callosum, exhibit strong differences  
333 between QC bins. In most bundles, low QC scores tend to flatten the profile, indicating that mean  
334 diffusivity appears artifactually homogeneous across the bundle.

335 The effect of QC score on white matter  
336 bundle profiles indicates that researchers  
337 using HBN-POD2 should incorporate QC in  
338 their analyses, either by applying a QC cut-  
339 off when selecting participants or by explic-  
340 itly adding QC score to their inferential mod-  
341 els. Failure to do so may cause spurious  
342 associations or degrade predictive perfor-  
343 mance. To demonstrate this, we selected  
344 participant age as a representative pheno-  
345 typic benchmark because (i) it operates on a  
346 natural scale with meaningful units and  
347 (ii) despite the unique methodological chal-  
348 lenges it presents for biomarker identifica-  
349 tion (*Nelson et al., 2020*), brain age pre-  
350 diction may be diagnostic of overall brain  
351 health (*Franke et al., 2010; Cole et al., 2019;*  
352 *Richie-Halford et al., 2021*). We observed  
353 the effect of varying QC cutoff on the predic-  
354 tive performance of an age prediction model.  
355 Cross-validated  $R^2$  scores for an age predic-  
356 tion model varied depending on the QC cut-

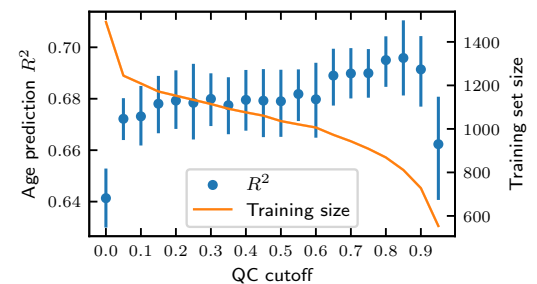

**Figure 9. Imposing a QC cutoff improves age prediction:** Cross validated  $R^2$  scores (left axis, blue dots) from an age prediction model increase after screening participants by QC score. We see the most dramatic increase in  $R^2$  after imposing even the lowest cutoff of 0.05. Thereafter, the  $R^2$  scores trend upward until a cutoff of  $\sim 0.95$ , where the training set size (right axis, orange line) becomes too small to sustain model performance. The error bands represent a bootstrapped 95% confidence interval.

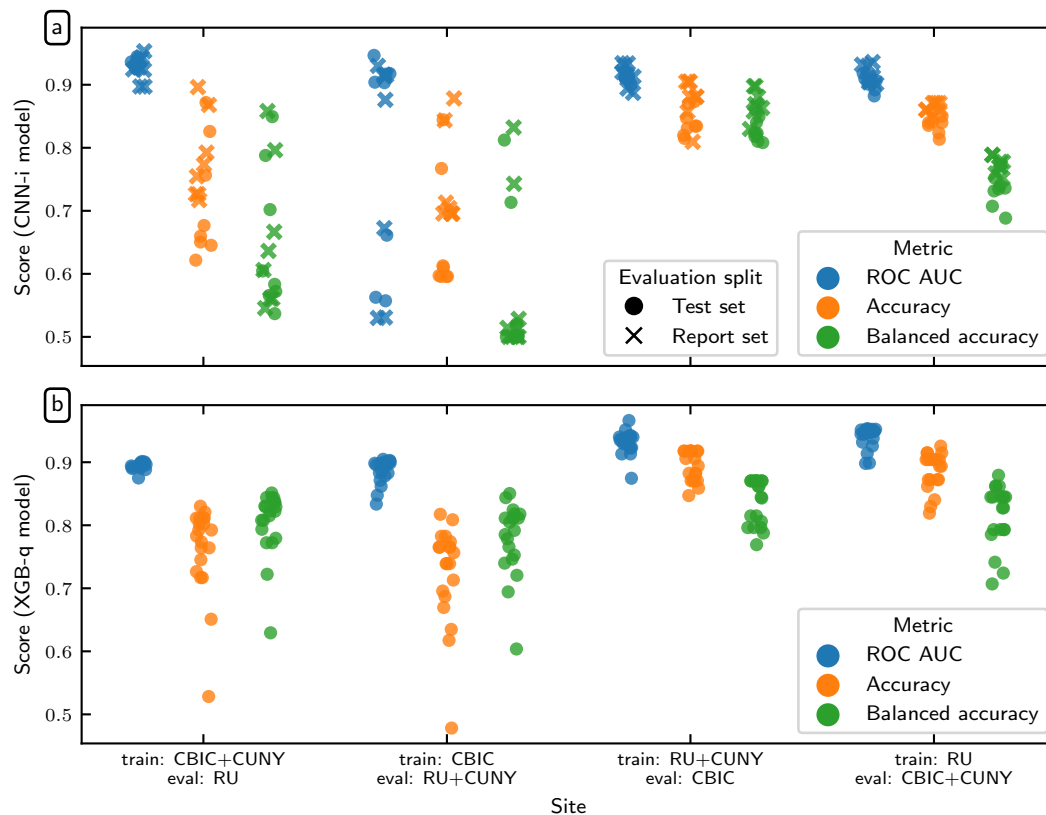

**Figure 7. Generalization of QC scores to unseen sites:** In each experiment, CNN-i (a) and XGB-q (b) models were trained with some sites held out and evaluated only on data from these held out sites. Model performance is quantified as ROC-AUC (blue), accuracy (orange) and balanced accuracy (green). For XGB-q, the targets are the expert ratings on data from the held out site. For CNN-i, performance is scored against XGB scores (as used before; test set in filled circles), or expert ratings on the data from the held out site (report set in crosses). Summary statistics for this plot are listed in Table 1.

**Table 1. Site generalization summary statistics:** Below we list the mean  $\pm$  standard deviation of the site generalization evaluation metrics displayed in Figure 7. For each of the CNN-i and XGB-q model families and each of the site generalization splits, we report the accuracy, balanced accuracy, and ROC-AUC.

| Model | Site                         | Accuracy          | Balanced accuracy | ROC-AUC           |
|-------|------------------------------|-------------------|-------------------|-------------------|
| CNN-i | train: CBIC + CUNY, test: RU | $0.748 \pm 0.086$ | $0.652 \pm 0.112$ | $0.930 \pm 0.015$ |
|       | train: CBIC, test: RU + CUNY | $0.696 \pm 0.095$ | $0.574 \pm 0.123$ | $0.791 \pm 0.169$ |
|       | train: RU + CUNY, test: CBIC | $0.859 \pm 0.033$ | $0.847 \pm 0.030$ | $0.912 \pm 0.013$ |
|       | train: RU, test: CBIC + CUNY | $0.851 \pm 0.018$ | $0.753 \pm 0.029$ | $0.910 \pm 0.014$ |
| XGB-q | train: CBIC+CUNY, test: RU   | $0.763 \pm 0.071$ | $0.805 \pm 0.052$ | $0.895 \pm 0.006$ |
|       | train: CBIC, test: RU+CUNY   | $0.725 \pm 0.079$ | $0.779 \pm 0.058$ | $0.886 \pm 0.019$ |
|       | train: RU+CUNY, test: CBIC   | $0.894 \pm 0.024$ | $0.838 \pm 0.036$ | $0.931 \pm 0.018$ |
|       | train: RU, test: CBIC+CUNY   | $0.886 \pm 0.030$ | $0.816 \pm 0.048$ | $0.940 \pm 0.017$ |

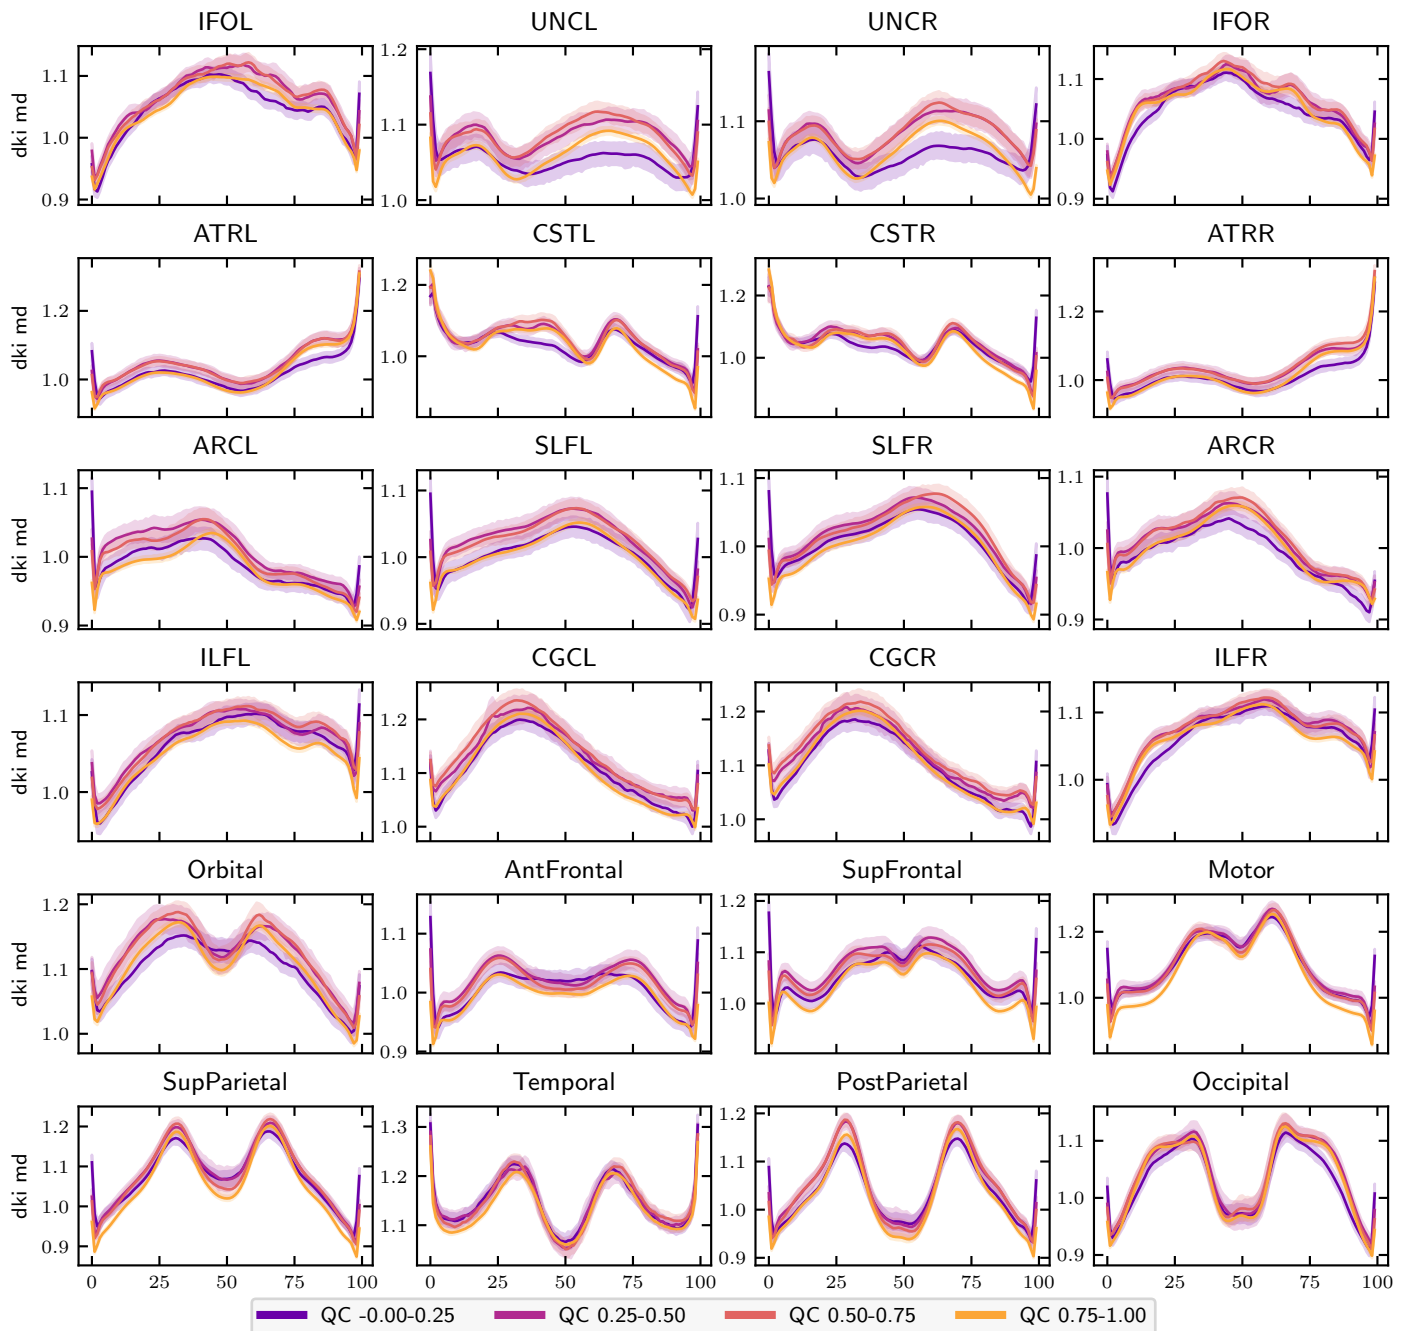

**Figure 8. MD bundle profiles show large QC group differences:** MD profiles binned by QC score in twenty-four major white matter bundles. The x-axis represents distance along the length of the fiber bundle. The left and right uncinate bundles were the most sensitive to QC score. Generally, QC score tended to flatten bundle profiles. Error bands represent bootstrapped 95% confidence intervals. Bundle abbreviations for lateralized bundles contain a trailing “L” or “R” indicating the hemisphere. Bundle abbreviations: inferior fronto-occipital fasciculus (IFO), uncinate (UNC), thalamic radiation (ATR), corticospinal (CST), arcuate (ARC), superior longitudinal fasciculus (SLF), inferior longitudinal fasciculus (ILF), cingulum cingulate (CGC), orbital corpus callosum (Orbital), anterior frontal corpus callosum (AntFrontal), superior frontal corpus callosum (SupFrontal), motor corpus callosum (Motor), superior parietal corpus callosum (SupParietal), temporal corpus callosum (Temporal), post-parietal corpus callosum (PostParietal), and occipital corpus callosum (Occipital).

**Figure 8-Figure supplement 1. FA bundle profiles**



357 off (Figure 9). An initial large improvement was achieved by excluding the 200 participants with the  
358 lowest QC scores, followed by a gradual increase in performance. Finally, when a large number of  
359 participants is excluded, performance deteriorated again.

## 360 Discussion

361 We present HBN-POD2, one of the largest child and adolescent diffusion imaging datasets with  
362 preprocessed derivatives that is currently openly available. The dataset was designed to comply  
363 with the best practices of the field. For example, it complies with the current draft of the BIDS  
364 diffusion derivative specification (*Pestilli et al., 2021*). It will grow continuously as the HBN study  
365 acquires more data, eventually reaching its 10,000 participant goal.

### 366 Preprocessing and quality control increase the impact of openly-available data

367 The most immediate contribution of this work is a large analysis-ready dMRI data resource, openly  
368 accessible to the public. In the past decade, projects such as the Human Connectome Project (HCP)  
369 (*Van Essen et al., 2013*), UK Biobank (*Miller et al., 2016*), ABCD (*Jernigan and Brown, 2018*), and Cam-  
370 CAN (*Taylor et al., 2017; Shafto et al., 2014*) and of course FCP-INDI (which includes HBN) (*Mennes  
371 et al., 2013*) have ushered a culture of data sharing in open big-data neuroscience. The adoption  
372 and reuse of these datasets reduces or eliminates the data collection burden on downstream re-  
373 searchers. Some projects, such as the HCP (*Glasser et al., 2013*), also provide preprocessed deriva-  
374 tives, further reducing researchers' burden and extending the benefits of data-sharing from data  
375 collection to preprocessing and secondary analysis. Following the example of the HCP, HBN-POD2  
376 provides analysis-ready dMRI derivatives. This avoids duplication of and heterogeneity across the  
377 preprocessing effort while also ensuring a minimum standard of data quality for HBN researchers.  
378 We also provide the CuBIDS variant annotation in the participants.tsv file, allowing researchers to  
379 account for the imaging heterogeneity inherent in a dataset of this size. Making MRI derivatives  
380 accessible not only reduces the burden of processing large datasets for research groups with lim-  
381 ited resources (*Laird, 2021*), but also aids research performed by clinicians who are interested in  
382 brain-behavior relationships but may be lacking the technical training to process large-scale dMRI  
383 data.

384 The data is amenable to many different analyses, including tractometry (*Yeatman et al., 2012,  
385 2018; Kruper et al., 2021*), graph theoretical analysis (*Yeh et al., 2020*), and combinations with func-  
386 tional MRI data and other data types for the same participants. The availability of standardized  
387 preprocessed diffusion data will allow researchers to create and test hypotheses on the white mat-  
388 ter properties underlying behavior and disease, from reading and math acquisition to childhood  
389 adversity and mental health. As such, this dataset will accelerate discovery at the nexus of white  
390 matter microstructure and neurodevelopmental and learning disorders.

391 In large developmental datasets, it is critically important to perform accurate and reliable QC  
392 of the data. QC is associated not just with age, but with many phenotypic variables of interest in  
393 cognition and psychopathology (*Siegel et al., 2017*). HBN-POD2 provides four separate QC scores  
394 alongside its large dataset of pediatric neuroimaging diffusion derivatives, paving the way for users  
395 of the data to incorporate considerations of data quality into their analysis of the processed data.  
396 Unsurprisingly, QC scores are strongly correlated with age (Figure 5). This accords with the negative  
397 association between head motion and age in developmental studies, which is well established both  
398 in general (*Power et al., 2012; Satterthwaite et al., 2012; Fair et al., 2012; Yendiki et al., 2014*)  
399 and specifically for resting-state fMRI in the HBN dataset (*Alexander et al., 2017*). Moreover, it  
400 is important that QC has bundle-specific and spatially localized effects (Figure 8). Analysis of this  
401 data that does not incorporate QC is likely to find replicable but invalid effects. For example, in  
402 patient-control studies, patients are likely to have lower quality data. And analysis of such patient  
403 data that does not control for QC will find spatially-localized and replicable group differences that  
404 are due to data quality, not necessarily underlying neuroanatomical differences.

405 We further demonstrated the impact of QC in a benchmark age prediction task (Figure 9). In  
406 this case, the increase in model performance from imposing a QC cutoff is intuitive: we know  
407 from Figure 8 that participants with low QC scores have reduced MD, but MD also decreases as  
408 participants mature (*Yeatman et al., 2014; Richie-Halford et al., 2021*). Eliminating participants with  
409 low QC therefore removes the ones who may look artificially older from the analysis, improving  
410 overall performance. The most noticeable improvement in performance comes after imposing  
411 the most modest cutoff of 0.05, suggesting that inferences may benefit from *any* QC screening. On  
412 the other hand, QC screening inherently introduces a tradeoff between the desire for high quality  
413 data and the desire for a large sample size. In this case, after a QC cutoff of around 0.9, the training  
414 set size is reduced such that it degrades predictive performance. Importantly, we do not expect  
415 the sensitivity analysis of an age prediction model to generalize to other analyses and therefore  
416 recommend that researchers using HBN-POD2 choose the most appropriate QC cutoff for their  
417 research question and consider including QC score as a model covariate in their analyses.

### 418 **Automated quality control: scalability, interpretability, and generalization**

419 The predictive performance of the CNN-i model (Figure 5a) gives us confidence that it could ac-  
420 curately classify unseen data from the same sites, justifying its extension to the entire HBN-POD2  
421 dataset and to future releases of HBN. However, one limitation of this model is that it does not satis-  
422 factorily explain its decisions. As deep learning models have been increasingly applied to medical  
423 image analysis, there is an evolving interest in the interpretability of these models (*Salahuddin*  
424 *et al., 2022; Lipton, 2017; Zech et al., 2018; Ghassemi et al., 2021*). While an exhaustive interpre-  
425 tation of deep learning QC models is beyond the scope of this work, we provided a preliminary  
426 qualitative interpretation of the CNN-i model (Figure 6) that demonstrates the intuitive nature of  
427 its decisions.

428 The accuracy in generalizing to unseen data from HBN also suggested the tantalizing possibility  
429 that the QC models would be able to generalize to similar data from other datasets. To assess this,  
430 we trained the models with unseen sites held out (Figure 7). Both the CNN-i model and the XGB-q  
431 model do sometimes generalize to data from unseen sites, suggesting that they would be able to  
432 generalize to some other datasets as well. However, they do not reliably generalize, implying that  
433 they should not currently be used in this way. Future work could build upon the work that we have  
434 done here to establish a procedure whereby the models that we fit in HBN would be applied to data  
435 from other studies, but comprehensive calibration and validation would have to be undertaken as  
436 part of this procedure.

437 We recognize that decisions about QC inclusion must balance accuracy, interpretability, gener-  
438 alization to new data, and scalability to ever larger datasets. We therefore provide three additional  
439 scores: (i) the mean expert QC score for the 200 participants in the gold standard dataset, (ii) the  
440 scores predicted by the XGB model, which outperformed all other models when evaluated against  
441 the gold standard ratings, but which are only available for participants that have community sci-  
442 ence scores, and (iii) the scores predicted by the XGB-q model, which underperformed the deep  
443 learning generated scores, but which rely only on the automated QC metrics output by *QSIPrep*.  
444 We view the XGB-q scores, which are available for all participants, as a more interpretable and scal-  
445 able fallback because the XGB-q model ingests *QSIPrep* output without any further postprocess-  
446 ing. XGB-q also provides slightly more uniform performance in generalization to unseen HBN sites  
447 (Figure 7). Because the XGB-q model most readily generalizes to other *QSIPrep* outputs, we pack-  
448 age it as an independent QC service in the QSIQC software package (*Richie-Halford and Rokem,*  
449 *2022b*), available both as a docker image at [ghcr.io/richford/qsicq](https://ghcr.io/richford/qsicq) and as a Streamlit app at  
450 <https://share.streamlit.io/richford/qsicq/main/app.py>. The decision to use a more interpretable but  
451 slightly less performant method of generating QC scores was also advocated by (*Tobe et al., 2021*),  
452 who noted that the Euler number of T1-weighted images (*Rosen et al., 2018*) in the NKI-Rockland  
453 dataset can reliably predict scores generated with *BrainDr*, the community science application de-  
454 veloped in our previous work (*Keshavan et al., 2019*).

455 We also note that the issue of algorithmic impact in choosing a QC method is not exclusive to  
456 the deep learning model. We have chosen models that most reliably reproduce the gold standard  
457 ratings, but a reliable algorithm might still negatively influence researcher's decisions. For example,  
458 excluding participants by QC score could spur them to exclude populations deserving of study,  
459 as when QC score is highly correlated with age or socio-economic status. We therefore caution  
460 researchers to examine interactions between the QC scores we provide and their phenotype of  
461 interest.

462 More generally, QC in the dataset that we have produced is fundamentally anchored to the  
463 decisions made by the expert observers. While Cohen's  $\kappa$  between some pairs of experts can be  
464 as low as 0.52, IRR quantified across all of the experts with ICC3k is excellent. Nevertheless, it is  
465 possible that improvements to the final QC scores could be obtained through improvements to  
466 IRR, or by designing a more extensive expert QC protocol. The tradeoff between more extensive  
467 QC for each participant and more superficial QC on more participants was not explored in this  
468 study, but could also be the target for future research.

### 469 **Transparent pipelines provide an extensible baseline for future methods**

470 While the primary audience of HBN-POD2 is researchers in neurodevelopment who will use the  
471 dMRI derivatives in their studies, other researchers may use HBN-POD2 to develop new prepro-  
472 cessing algorithms or quality control methods. In this respect, HBN-POD2 follows *Avesani et al.*  
473 (2019), who recognized the diverse interests that different scientific communities have in reusing  
474 neuroimaging data and coined the term *data upcycling* to promote multiple-use data sharing for  
475 purposes secondary to those of the original project. Complementing the approach taken in Avesani  
476 et al.'s work, which provided dMRI from a small number of participants preprocessed with many  
477 pipelines, HBN-POD2 contains many participants, all processed with a single state of the art pipeline,  
478 *QSIPrep*. For researchers developing new preprocessing algorithms, HBN-POD2 provides a large,  
479 openly available baseline to which they can compare their results.

480 Similarly, neuroimaging QC methods developers will benefit from a large benchmark dataset  
481 of expert, community science, and automated QC ratings, with which to test new methods. Im-  
482 portantly, the architecture and parameters of the deep learning network used for QC are also  
483 provided as part of this work, allowing application of this network to future releases of HBN data,  
484 and allowing other researchers to build upon our efforts. Indeed, in this work, we have extended  
485 our previous work on what we now call "hybrid QC". This approach, which we originally applied  
486 to the first two releases of the HBN T1-weighted data (*Keshavan et al., 2019*) (using the *Braindr*  
487 web app: <https://braindr.us>) was extended here in several respects. First, the *Braindr* study used a  
488 smaller dataset of approximately 700 participants, while we extended this approach to well over  
489 2000 participants. Second, *Braindr* relied on approximately 80,000 ratings from 261 users. Here,  
490 we received more than 500,000 ratings from 374 community scientists. As our understanding of  
491 the role of community scientist contributions has evolved, we decided that we would include as col-  
492 lective co-authors community scientists who contributed more than 3000 ratings (*Ward-Fear et al.,*  
493 2020). Third, *Braindr* used data from only a single site. Here, multi-site data was used. This opens  
494 up multiple possibilities for deeper exploration of between-site quality differences, and also for har-  
495 monization of QC across sites, as we have attempted here. Last, the most challenging extension of  
496 hybrid QC from *Braindr* to this study entailed developing an approach that would encompass multi-  
497 volume dMRI data. On the one hand, this meant that the task performed by the expert observers  
498 was more challenging, because it required examination of the full dMRI time-series for every scan.  
499 To wit, expert inter-rater reliability was considerably higher for the T1-weighted only data in *Ke-*  
500 *shavan et al. (2019)* than for the dMRI data used (Figure 3e). On the other hand, it also meant that  
501 the 4D data had to be summarized into 2D data to be displayed in the *Fibr* web application. This  
502 was achieved by summarizing the entire time-series as a  $\text{DEC-FA} + b = 0$  image and presenting  
503 community scientists with animated sections of these images that showed how the data extended  
504 over several horizontal slices. In addition, the extension to 4D data required developing new deep

505 learning architectures for analysis of 4D images, including upstream contributions to *Nobrainer*, a  
506 community-developed software library for deep learning in neuroimaging data (*Kaczmarzyk et al.,*  
507 **2021**). These extensions demonstrate that the hybrid QC approach generalizes very well to a vari-  
508 ety of different circumstances. Future applications of this approach could generalize to functional  
509 MRI data, as well as other large datasets from other kinds of measurements and other research  
510 domains.

### 511 **Future work and open problems**

512 The HBN study plans to acquire imaging data for over 5000 participants, necessitating future data  
513 releases. Since future releases of HBN will also require future releases of HBN-POD2, a plan for  
514 these is essential. This is a general issue affecting multi-year neuroimaging projects for which  
515 derivative data is being released before study completion. The use of *QSIprep*, *cloudknot* and the  
516 containerization of the QC score assignment process facilitate running the exact pipeline described  
517 in this paper on newly released participants. However, this approach is somewhat unsatisfactory  
518 because it fails to anticipate improvements in preprocessing methodology. That is, what should we  
519 do when *QSIprep* is inevitably updated between HBN releases? Enforce standardization by using an  
520 outdated pipeline or use state-of-the-art preprocessing at the expense of standardized processing  
521 between releases? Because the use of *cloudknot* and AWS Spot Instances renders preprocessing  
522 fast and relatively inexpensive, we propose a third way: if improvements to the preprocessing  
523 pipeline are available with a new HBN release, we plan to execute the improved pipeline on the  
524 entire HBN dataset, while preserving the previous baseline release in an archived BIDS derivative  
525 dataset.

526 Undertaking the processing and QC effort to generate HBN-POD2 required construction and  
527 deployment of substantial informatics infrastructure, including tools for cloud computing, web  
528 applications for expert annotation and for community science rating and analysis software. All of  
529 these tools are provided openly, so that this approach can be generalized even more widely in  
530 other projects and in other scientific fields.

### 531 **Methods and Materials**

532 To facilitate replicability, Jupyter notebooks (*Kluyver et al., 2016*) and Dockerfiles (*Merkel, 2014*) nec-  
533 essary to reproduce the methods described herein are provided in the HBN-POD2 GitHub reposi-  
534 tory at <https://github.com/richford/hbn-pod2-qc>. The specific version of the repository used in this  
535 study is documented in *Richie-Halford and Rokem (2022a)*. The `make` or `make help` commands will  
536 list the available commands and `make build` will build the requisite Docker images to analyze HBN-  
537 POD2 QC data. In order to separate data from analysis code (*Wilson et al., 2017*), we provide inter-  
538 mediate data necessary to analyze the QC results in an OSF (*Foster and Deardorff, 2017*) project  
539 (*Richie-Halford and Rokem, 2021*), which can be downloaded using the `make data` command in the  
540 root of the HBN-POD2 GitHub repository. Most of the code in this repository uses Pandas (*McKin-  
541 ney, 2010; pandas development team, 2020*), Numpy (*Harris et al., 2020*), Matplotlib (*Hunter, 2007*),  
542 and Seaborn (*Waskom, 2021*).

### 543 **Inputs**

544 Inputs for this study consisted of MRI data from the Healthy Brain Network pediatric mental health  
545 study (*Alexander et al., 2017*), containing dMRI data from 2747 participants aged 5-21 years. These  
546 data were measured using a 1.5 T Siemens mobile scanner on Staten Island (SI) and three fixed 3 T  
547 Siemens MRI scanners at sites in the New York area: Rutgers University Brain Imaging Center (RU),  
548 the CitiGroup Cornell Brain Imaging Center (CBIC), and the City University of New York Advanced  
549 Science Research Center (CUNY). Informed consent was obtained from each participant aged 18 or  
550 older. For participants younger than 18, written consent was obtained from their legal guardians  
551 and written assent was obtained from the participant. Voxel resolution was 1.8 mm × 1.8 mm ×  
552 1.8 mm with 64 non-colinear directions measured for each of  $b = 1000 \text{ s/mm}^2$  and  $b = 2000 \text{ s/mm}^2$ .

## 553 BIDS curation

554 We curated the imaging metadata for 2615 of the 2747 currently available HBN participants. Using  
555 `dcm2bids` and custom scripts, we conformed the data to the Brain Imaging Data Structure (BIDS;  
556 *Gorgolewski et al., 2016*) specification. The BIDS-curated dataset is available on FCP-INDI and can  
557 be accessed via AWS S3 at [s3://fcp-indi/data/Projects/HBN/BIDS\\_curated/](s3://fcp-indi/data/Projects/HBN/BIDS_curated/).

558 After conforming the data to BIDS, we used the “Curation of BIDS” (CuBIDS) package (*Covitz  
559 et al., 2022*) to identify unique combinations, or “variants” of imaging parameters in the curated  
560 dataset. CuBIDS is a Python-based software package that provides a sanity-preserving workflow  
561 to help users reproducibly parse, validate, curate, and understand heterogeneous BIDS imaging  
562 datasets. CuBIDS includes a robust implementation of the BIDS Validator that scales to large sam-  
563 ples and incorporates DataLad (*Halchenko et al., 2021*), a distributed data management system,  
564 to ensure reproducibility and provenance tracking throughout the curation process. CuBIDS tools  
565 also employ agglomerative clustering to identify the aforementioned variants of imaging param-  
566 eters. Users may then test BIDS-Apps on a subset of participants that represent the full range of  
567 acquisition parameters that are present. These variants are listed in the `participants.tsv` file in the  
568 BIDS-curated dataset.

## 569 Preprocessing

570 We performed dMRI preprocessing on 2615 participants, using *QSIprep* (*Cieslak et al., 2021*) 0.12.1,  
571 which is based on *Nipype* 1.5.1 (*Gorgolewski et al., 2011, 2018*), RRID:SCR\_002502. *QSIprep* a robust  
572 and scalable pipeline to group, distortion correct, motion correct, denoise, coregister and resample  
573 MRI scans. In total, 417 participants failed this preprocessing step, largely due to missing dMRI files.  
574 In keeping with the BIDS specification, the preprocessed dataset is available as a derivative dataset  
575 within the BIDS-curated dataset and can be access on AWS S3 at [s3://fcp-indi/data/Projects/HBN/  
576 BIDS\\_curated/derivatives/qsiprep/](s3://fcp-indi/data/Projects/HBN/BIDS_curated/derivatives/qsiprep/). *QSIprep* fosters reproducibility by automatically generating thor-  
577 ough methods boilerplate for later use in scientific publications, which we use for the remainder  
578 of this subsection to document each preprocessing step.

579 • *Anatomical data preprocessing* The T1-weighted (T1w) image was corrected for intensity non-  
580 uniformity (INU) using `N4BiasFieldCorrection` (*Tustison et al., 2010*) (ANTs 2.3.1), and used  
581 as T1w-reference throughout the workflow. The T1w-reference was then skull-stripped us-  
582 ing `antsBrainExtraction.sh` (ANTs 2.3.1), using OASIS as target template. Spatial normaliza-  
583 tion to the ICBM 152 Nonlinear Asymmetrical template version 2009c (*Fonov et al. (2009b)*,  
584 RRID:SCR\_008796) was performed through nonlinear registration with `antsRegistration`  
585 (*Avants et al. (2008)*, ANTs 2.3.1, RRID:SCR\_004757), using brain-extracted versions of both  
586 T1w volume and template. Brain tissue segmentation of cerebrospinal fluid (CSF), white-  
587 matter (WM) and gray-matter (GM) was performed on the brain-extracted T1w using `FAST`  
588 (*Zhang et al., 2001*), FSL 6.0.3:b862cdd5, RRID:SCR\_002823.

### 589 • *Diffusion data preprocessing*

590 Any images with a  $b$ -value less than  $100 \text{ s/mm}^2$  were treated as a  $b = 0$  image. MP-PCA denois-  
591 ing as implemented in MRtrix3’s `dwidenoise` (*Veraart et al., 2016*) was applied with a 5-voxel  
592 window. After MP-PCA, B1 field inhomogeneity was corrected using `dwibiascorrect` from  
593 MRtrix3 with the N4 algorithm (*Tustison et al., 2010*). After B1 bias correction, the mean in-  
594 tensity of the DWI series was adjusted so all the mean intensity of the  $b = 0$  images matched  
595 across each separate DWI scanning sequence.

596 FSL (version 6.0.3:b862cdd5)’s `eddy` was used for head motion correction and Eddy current  
597 correction (*Andersson and Sotiropoulos, 2016*). Eddy was configured with a  $q$ -space smooth-  
598 ing factor of 10, a total of 5 iterations, and 1000 voxels used to estimate hyperparameters.  
599 A linear first level model and a linear second level model were used to characterize Eddy  
600 current-related spatial distortion.  $q$ -space coordinates were forcefully assigned to shells. Field  
601 offset was attempted to be separated from participant movement. Shells were aligned post-



602 eddy. Eddy's outlier replacement was run (*Andersson et al., 2016*). Data were grouped by  
603 slice, only including values from slices determined to contain at least 250 intracerebral vox-  
604 els. Groups deviating by more than four standard deviations from the prediction had their  
605 data replaced with imputed values. Data was collected with reversed phase-encode blips, re-  
606 sulting in pairs of images with distortions going in opposite directions. Here,  $b = 0$  reference  
607 images with reversed phase encoding directions were used along with an equal number of  
608  $b = 0$  images extracted from the DWI scans. From these pairs the susceptibility-induced off-  
609 resonance field was estimated using a method similar to that described in (*Andersson et al.,*  
610 *2003*). The fieldmaps were ultimately incorporated into the Eddy current and head motion  
611 correction interpolation. Final interpolation was performed using the `jac` method.  
612 Several confounding time-series were calculated based on the *preprocessed DWI*: framewise  
613 displacement (FD) using the implementation in *Nipype* following the definitions by (*Power*  
614 *et al., 2014*). The DWI time-series were resampled to ACPC, and their corresponding gradient  
615 directions were rotated accordingly to generate a *preprocessed DWI run in ACPC space*.

616 Many internal operations of *QSIprep* use *Nilearn* 0.6.2 (*Abraham et al., 2014*), RRID:SCR\_001362  
617 and *DIPY* (*Garyfallidis et al., 2014*). For more details of the pipeline, see [the section corresponding](#)  
618 [to workflows in QSIprep's documentation](#).

### 619 **Cloud-based distributed preprocessing**

620 The containerization of *QSIprep* provided a consistent preprocessing pipeline for each participant  
621 but the number of participants made serial processing of each participant prohibitive on a single  
622 machine. We used *cloudknot*, a previously developed cloud-computing library (*Richie-Halford and*  
623 *Rokem, 2018*) to parallelize the preprocessing over individual participants on spot instances in the  
624 Amazon Web Services Batch service. *Cloudknot* takes as input a user-defined Python function and  
625 creates the necessary AWS infrastructure to map that function onto a range of inputs, in this case,  
626 the participant IDs. The Python preprocessing function was a thin wrapper around *QSIprep's* com-  
627 mand line interface and is provided in a Jupyter notebook in the HBN-POD2 GitHub repository in  
628 the "notebooks" directory. Using *cloudknot* and AWS Batch Spot Instances, the preprocessing cost  
629 less than \$1.00 per participant.

### 630 **Expert quality control**

631 The expert QC "gold standard" subset was created by randomly selecting 200 participants from the  
632 preprocessed dataset, sampled such that the proportional site distribution in the gold standard  
633 subset matched that of the preprocessed dataset.

634 We created a web application for expert quality control of preprocessed dMRI, called *dmriprep-*  
635 *viewer* (*Richie-Halford et al., 2022*). The viewer ingests *QSIprep* outputs and generates a browser-  
636 based interface for expert QC. It provides a study overview displaying the distributions of *QSIprep's*  
637 automated data quality metrics (described at [https://qsiprep.readthedocs.io/en/latest/preprocessing.](https://qsiprep.readthedocs.io/en/latest/preprocessing.html#quality-control-data)  
638 [html#quality-control-data](https://qsiprep.readthedocs.io/en/latest/preprocessing.html#quality-control-data)). Each datum on the study overview page is interactively linked to a  
639 participant-level QC page that provides an interactive version of *QSIprep's* visual reports (described  
640 at <https://qsiprep.readthedocs.io/en/latest/preprocessing.html#visual-reports>). The viewer allows users  
641 to assign a rating of  $-2$  (definitely fail),  $-1$  (probably fail),  $0$  (not sure),  $1$  (probably pass), or  $2$  (defi-  
642 nitely pass) to a participant. To standardize rater expectations before rating, expert raters watched  
643 a tutorial video (available on YouTube at <https://youtu.be/SQ0v-O-e5b8> and in the OSF project). They  
644 then rated each participant and saved their scores and sent them to the lead author for compila-  
645 tion.

646 To compute the pairwise Cohen's  $\kappa$  scores in Figure 3e, we used the *scikit-learn* (*Pedregosa et al.,*  
647 *2011*) `cohen_kappa_score` function with quadratic weights. To compute intra-class correlation, we  
648 used the *pingouin* statistical package (*Vallat, 2018*) `intraclass_corr` function. The expert rating  
649 analysis can be replicated using the `make expert-qc` command in the HBN-POD2 GitHub repository.

650 The mean expert ratings were scaled to the range 0 to 1, so that a mean rating from 0 to 0.2  
651 corresponds to an expert rating of “definitely fail”, a mean rating from 0.2 to 0.4 corresponds to  
652 “probably fail”, from 0.4 to 0.6 corresponds to “not sure”, from 0.6 to 0.8 corresponds to “probably  
653 pass”, and 0.8 to 1.0 corresponds to “definitely pass.” These expert scores are available in the  
654 “expert\_qc\_score” column of the `participants.tsv` file on FCP-INDI.

### 655 **Community scientist quality control**

656 The community science web application is based on the SwipesForScience framework <https://swipesforscience.org/>, which generates a web application for community science given an open repository of images to be labelled and a configuration file. The source code for the *Fibr* web application is available at <https://github.com/richford/fibr>. After a brief tutorial, community scientists provided binary pass/fail ratings based on the DEC-FA from a fit of a DTI model to each participant’s preprocessed dMRI data. These images were generated using a *DIPY* (Garyfallidis et al., 2014) `TensorModel` in a *cloudknot*-enabled Jupyter notebook that is available in the “notebooks” directory of the *Fibr* GitHub repository. *Fibr* saves each community rating to its Google Firebase backend, the contents of which have been archived to the HBN-POD2 OSF project.

655 The *Fibr* ratings were then combined with 31 automated *QSIprep* data quality metrics to train the gradient boosted trees models XGB, XGB-f, and XGB-q. See Appendix 3 for a list of these automated QC metrics and a measure of their global feature importance in the XGB and XGB-q models. These models were implemented as binary classifiers using the XGBoost library (Chen and Guestrin, 2016b). The targets for these classifiers were the mean expert ratings in the gold standard dataset, rescaled to the range [0, 1] and binarized with a threshold of 0.5. Using repeated stratified K-fold cross-validation, with three splits and two repeats, we evaluated the models’ performance in predicting the gold standard ratings. In each fold, the best model hyperparameters were chosen using the `scikit-optimize` (Head et al., 2021) `BayesSearchCV` class. Saved model checkpoints for each cross-validation split are available in the HBN-POD2 OSF project. Since each split resulted in a different XGB model and we required a single QC score to train the deep learning model, we combined the models from each cross-validation split using a voting classifier, computing a weighted averaged of the predicted probability of passing from each model, weighted by its out-of-sample ROC-AUC. This was implemented using `scikit-learn`’s `VotingClassifier` class. Treating the voting classifier as another “expert” rater, we reassessed the pairwise Cohen’s  $\kappa$  and ICC scores as in the expert QC subsection. The community ratings analysis can be replicated using the `make_community-qc` command in the HBN-POD2 GitHub repository. The XGB model’s positive class probabilities are available in the “xgb\_qc\_score” column of the `participants.tsv` file on FCP-INDI, while the XGB-q model’s positive class probabilities are available in the “xgb\_qsiprep\_qc\_score” column.

### 684 **Deep learning to predict quality control**

685 The binarized voting classifier’s predictions were then used as targets to train a deep learning binary classifier to predict QC scores based on each participant’s preprocessed dMRI data. We trained two different model architectures: (i) CNN-i, which took only preprocessed dMRI images as input and (ii) CNN-i+q, whose input also included *QSIprep*’s automated data quality metrics. Both models were implemented in Tensorflow 2 (Abadi et al., 2015) using the Keras module (Chollet et al., 2015). The image processing part of the model architecture was identical for both models: a modification of an existing 3D CNN (Zunair et al., 2020) previously applied to assess tuberculosis severity (Dicente Cid et al., 2019). It accepts a 3D volume as input with four channels: (i) the  $b = 0$  reference volume, (ii) DEC-FA in the  $x$ -direction, (iii) DEC-FA in the  $y$ -direction and (iv) DEC-FA in the  $z$ -direction. The *QSIprep*’s automated QC metrics were included as an additional fifth channel. The CNN-i+q model architecture is summarized in Figure 10. Upon input, the CNN-i+q model extracts the imaging channels and passes them through the CNN architecture. The remaining data quality metrics channel is flattened and passed “around” the CNN architecture and concatenated with the output of the convolutional layers. This concatenated output is then passed through a

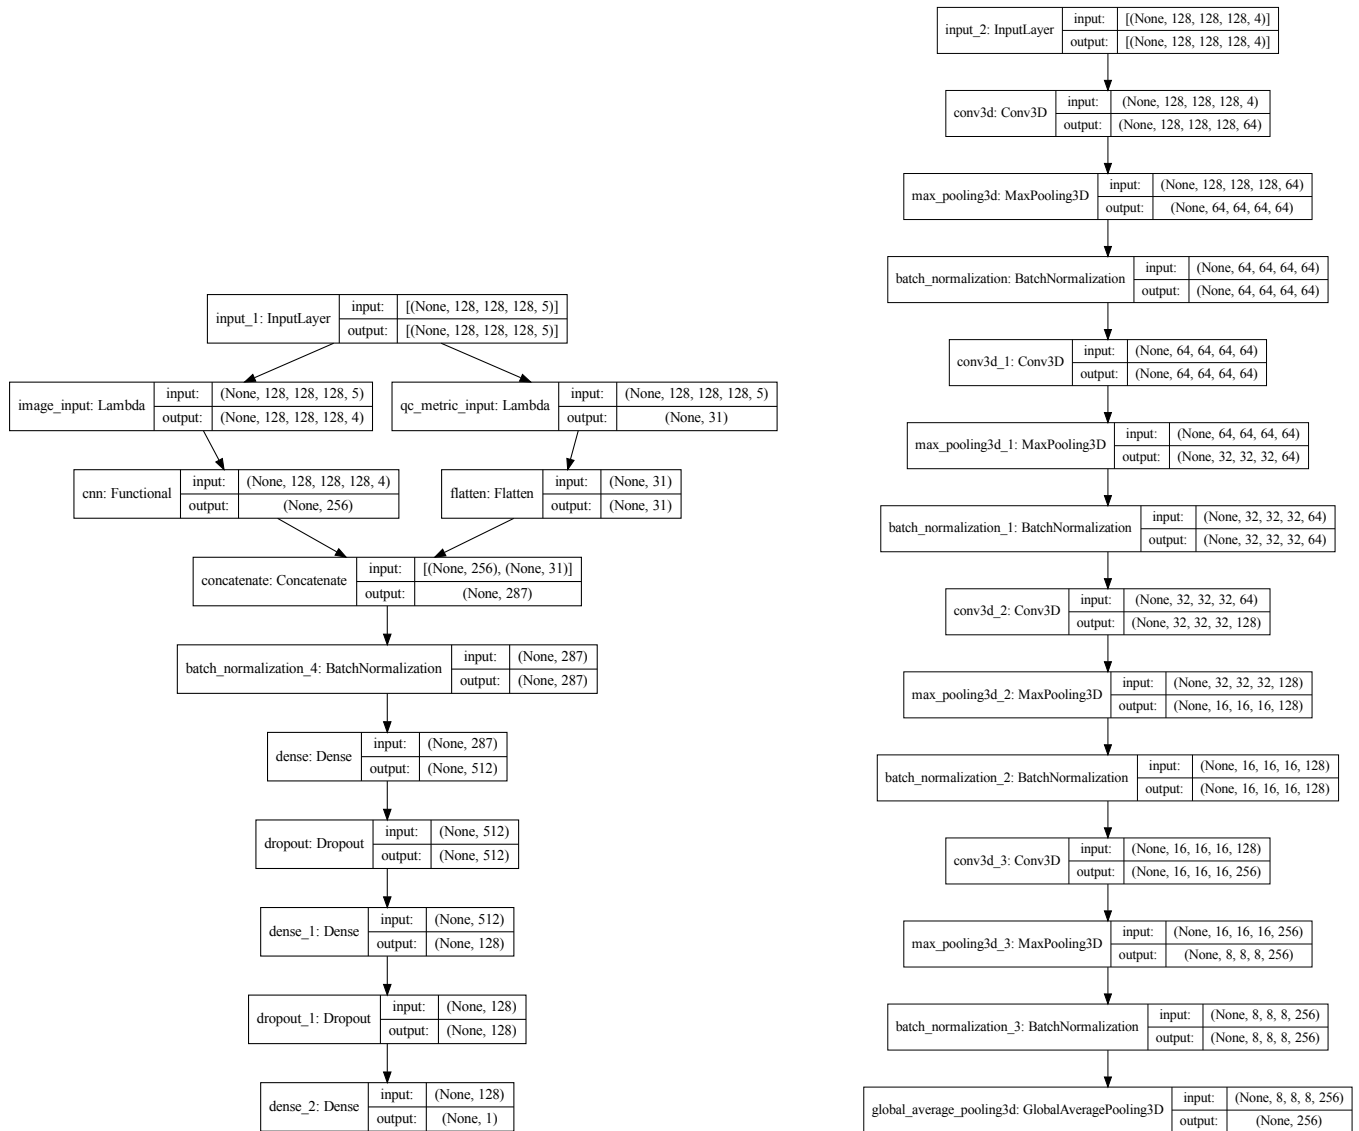

(a) Slicing and combining the input channels

(b) CNN architecture

**Figure 10. Deep learning model architecture:** (a) The CNN-i+q model accepts multichannel input that combined four imaging channels with a fifth channel containing 31 *QSIPrep* automated data quality metrics. The imaging channels are separated from the data quality channel using `Lambda` layers. The imaging channels are passed through a CNN (b), the output of which is concatenated with the data quality metrics, batch normalized and passed through two fully-connected (FC) layers, with rectified linear unit (ReLU) activation functions and with 512 and 128 units respectively. Each FC layer is followed by a dropout layer which drops 40% of the input units. The final layer contains a single unit with a sigmoid activation function and outputs the probability of passing QC. (b) The CNN portion of the model passes the imaging input through four convolutional blocks. Each block consists of a 3D convolutional layer with a kernel size of 3 and a ReLU activation, a 3D max pooling layer with a pool size of 2, and a batch normalization layer with Tensorflow's default parameters. The number of filters in the convolutional layers in each block are 64, 64, 128, and 256 respectively. The output of the final block is passed through a 3D global average pooling layer with Tensorflow's default parameters.

**Figure 10-Figure supplement 1.** Deep learning model loss curves

699 fully-connected layer to produce a single output, the probability of passing QC. This architecture  
700 has 1,438,783 trainable parameters.

701 We used *DIPY* ([Garyfallidis et al., 2014](#)) and *cloudknot* ([Richie-Halford and Rokem, 2018](#)) to gener-  
702 ate these multichannel volumes for each participant and save them as NIfTI-1 files ([Cox et al.,  
703 2004](#)). These NIfTI files were then converted to the Tensorflow TFRecord format using the *Nobrainier*  
704 deep learning framework ([Kaczmarzyk et al., 2021](#)). The Jupyter notebooks used to create these  
705 NIfTI and TFRecord files are available in the “notebooks” directory of the *Fibr* GitHub repository.

706 We trained each model using the Google Cloud AI Platform Training service; the HBN-POD2  
707 GitHub repository contains Docker services to launch training (with `make dl-train`) and prediction  
708 (with `make dl-predict`) jobs on Google Cloud, if the user has provided the appropriate credentials  
709 in an environment file and placed the TFRecord files on Google Cloud Storage. To estimate the  
710 variability in model training, we trained ten separate models using different training and valida-  
711 tion splits of the data. The gold standard dataset was not included in any of these splits and was  
712 reserved for reporting final model performance. Models were optimized for binary crossentropy  
713 loss using the Adam optimizer ([Kingma and Ba, 2017](#)) with an initial learning rate of 0.0001. We  
714 reduced the learning rate by a factor of 0.5 when the validation loss plateaued for more than two  
715 epochs. We also stopped training when the validation loss failed to improve by more than 0.001  
716 for twenty consecutive epochs. These two adjustments were made using the `ReduceLRonPlateau`  
717 and `EarlyStopping` callbacks in Tensorflow 2 ([Abadi et al., 2015](#)) respectively. The training and  
718 validation loss curves for both the CNN-i and CNN-i+q models are depicted in [Figure 10-Figure  
719 Supplement 1](#). While the CNN-i+q model achieved better validation loss, it did not outperform the  
720 CNN-i model on the held out gold standard dataset. The CNN-i+q model’s positive class probabili-  
721 ties are available in the “dl\_qc\_score” column of the `participants.tsv` file on FCP-INDI.

722 To generate the attribution maps, we followed Tensorflow’s integrated gradients tutorial ([Ten-  
723 sorFlow Authors, 2021](#)) with a black baseline image and 128 steps in the Riemann sum approxima-  
724 tion of the integral (i.e. `m_steps = 128`). In the HBN-POD2 GitHub repository, we provide a Docker  
725 service to compute integrated gradient attribution maps on Google Cloud, which can be invoked  
726 using the `make dl-integrated-gradients` command.

## 727 Site generalization experiments

728 To simulate the generalization of the XGB-q and CNN-i models to new scanning sites, we trained  
729 multiple versions of XGB-q and CNN-i with different scanning sites held out and then evaluated  
730 those models on the held out sites. These models were therefore evaluated on data from “un-  
731 seen” sites. We constructed these train/evaluate splits from combinations of the HBN sites with  
732 3T scanners (RU, CBIC, and CUNY), and excluded CUNY as a standalone training or test site be-  
733 cause of its low number of participants ( $N = 74$ ). This left four combinations of site-generated  
734 training splits: CBIC + CUNY (eval: RU), CBIC (eval: RU + CUNY), RU + CUNY (eval: CBIC), and RU  
735 (eval: CBIC + CUNY).

736 We trained eight models (with distinct random seeds) from the CNN-i family of models using  
737 the global XGB scores as targets, just as with the full CNN-i model. Similarly, we trained twenty  
738 models (with distinct random seeds) from the XGB-q family of models using the expert scores as  
739 targets, just as with the full XGB-q model. For each model, we reported three evaluation metrics:  
740 ROC-AUC, accuracy, and balanced accuracy. Because the distribution of QC scores was imbalanced  
741 (Figures 3a and 5d), we included balanced accuracy as an evaluation metric. Balanced accuracy  
742 avoids inflated accuracy estimates on imbalanced data ([Velez et al., 2007](#)), and in the binary clas-  
743 sification case, it is the mean of the sensitivity and specificity. For the CNN-i family, we further  
744 decomposed the evaluation split into a report set, for which expert scores were available, and a  
745 test set, with participants who were not in the “gold standard” dataset. For the report set, we eval-  
746 uated the model using the expert scores as the ground truth. For the test set, we evaluated each  
747 model using the XGB scores as ground truth.

748 Aside from the specification of train and evaluation splits, model training followed exactly the

749 same procedure as for the full dataset. For example, we use the same cross validation and hyperpa-  
750 rameter optimization procedure for the XGB-q family as for the original XGB-q model and the same  
751 architecture, input format, and early stopping criteria for the CNN-i family as for the CNN-i model.  
752 In the HBN-POD2 GitHub repository, we provide a Docker service to conduct the CNN-i site general-  
753 ization experiments Google Cloud, which can be invoked using the `make dl-site-generalization`  
754 command. The XGB-q site generalization experiments can be replicated locally using the `make`  
755 `site-generalization` command, which will also plot the results of the CNN-i experiments.

## 756 QC bundle profiles

757 To generate bundle profiles, reconstruction was performed using the *QSIprep* 0.12.1 preconfigured  
758 reconstruction workflow `mrtrix_multishell_msmt`, modified to generate two million streamlines  
759 rather than the default ten million. Multi-tissue fiber response functions were estimated using the  
760 dhollander algorithm. Fiber orientation distributions (FODs) were estimated via constrained spher-  
761 ical deconvolution (CSD, (*Tournier et al., 2004, 2008*)) using an unsupervised multi-tissue method  
762 (*Dhollander et al., 2019, 2016*). Reconstruction was done using MRtrix3 (*J-Donald et al., 2019*). FODs  
763 were intensity-normalized using `mtnormalize` (*Raffelt et al., 2017*).

764 These tractograms were then used as input to the Python Automated Fiber Quantification tool-  
765 box (pyAFQ) (*Kruper et al., 2021*). Twenty-four major tracts, which are enumerated in Figure 8,  
766 were identified using multiple criteria: streamlines are selected as candidates for inclusion in a  
767 bundle of streamlines that represents a tract if they pass through known inclusion ROIs and do  
768 not pass through exclusion ROIs (*Wakana et al., 2007*). In addition, a probabilistic atlas is used  
769 to exclude streamlines which are unlikely to be part of a tract and to adjudicate in cases where a  
770 streamline could belong to more than one tract (*Hua et al., 2008*). Each streamline is resampled  
771 to 100 nodes and the robust mean at each location is calculated by estimating the 3D covariance  
772 of the location of each node and excluding streamlines that are more than 5 standard deviations  
773 from the mean location in any node. Finally, a bundle profile of tissue properties in each bundle  
774 was created by interpolating the value of MRI maps of these tissue properties to the location of  
775 the nodes of the resampled streamlines designated to each bundle. In each of 100 nodes, the val-  
776 ues are summed across streamlines, weighting the contribution of each streamline by the inverse  
777 of the mahalanobis distance of the node from the average of that node across streamlines. This  
778 means that streamlines that are more representative of the tract contribute more to the bundle  
779 profile, relative to streamlines that are on the edge of the tract.

780 These processes create bundle profiles, in which diffusion measures are quantified and av-  
781 eraged along twenty-four major fiber tracts. We retain only the mean diffusivity (MD) and the  
782 fractional anisotropy (FA) from a diffusion kurtosis imaging (DKI) model (*Jensen et al., 2005*), im-  
783 plemented in DIPY (*Henriques et al., 2021*), and impute missing bundles using median imputation  
784 as implemented by *scikit-learn*'s `SimpleImputer` class. Because the HBN-POD2 bundle profiles ex-  
785 hibit strong site effects (*Richie-Halford et al., 2021*), we used the ComBat harmonization method  
786 to robustly adjust for site effects in the tract profiles. Initially designed to correct for site effects  
787 in gene expression studies (*Johnson et al., 2007*), ComBat employs a parametric empirical Bayes  
788 approach to adjust for batch effects and has since been applied to multi-site cortical thickness  
789 measurements (*Fortin et al., 2018*), multi-site DTI studies (*Fortin et al., 2017*), and functional MRI  
790 data in the Adolescent Brain Cognitive Development Study (ABCD) (*Nielson et al., 2018*). We rely  
791 on the *neurocombat\_sklearn* library (*Pinaya, 2020*), to apply ComBat in before plotting bundle pro-  
792 files in Figure 8 using plotting functions from the AFQ-Insight package (*Richie-Halford et al., 2019*).  
793 The bundle profile analysis can be replicated using the `make bundle-profiles` command in the  
794 HBN-POD2 GitHub repository.

## 795 Brain age prediction

796 We evaluated the effect of varying the QC cutoff on model performance by observing cross-validated  
797  $R^2$  values of gradient boosted trees models implemented using XGBoost. The input feature space



798 for each model consisted of 4800 features per participant, comprising 100 nodes for each of MD  
799 and FA in the twenty-four major tracts. We imputed missing bundles and harmonized the different  
800 scanning sites as above. The XGBoost models' hyperparameters were hand-tuned to values that  
801 have been performant in the authors' previous experience. Within the limited age range of the HBN  
802 study, MD and FA follow logarithmic maturation trajectories (*Yeatman et al., 2014*). We therefore  
803 log-transformed each participant's age before prediction using the `TransformedTargetRegressor`  
804 class from *scikit-learn*. For each value of the QC cutoff between 0 and 0.95, in steps of 0.05, we  
805 computed the cross-validated  $R^2$  values using *scikit-learn's* `cross_val_score` function with repeated  
806 K-fold cross-validation using five folds and five repeats.

## 807 Author contributions statement

808 The last two authors named share senior authorship. The first two authors named share lead  
809 authorship. The remaining authors are listed in alphabetical order, with the exception of the *Fibr*  
810 Community Science Consortium, whose members provided community science QC ratings and are  
811 listed in Appendix 4. We describe contributions to the paper using the CRediT taxonomy (*Brand*  
812 *et al., 2015; Allen et al., 2014*): Conceptualization: A.R-H., A.R., T.S., and M.C.; Methodology: A.R-H.  
813 and A.R.; Software: A.R-H., M.C., and S.C.; Validation: A.R-H., M.C., and S.C.; Formal Analysis: A.R-H.  
814 and M.C.; Investigation: A.R-H. and M.C.; Resources: A.R., T.S., and M.M.; Data Curation: S.C., M.C.,  
815 V.J.S., I.I.K., B.A-P. and L.A.; Writing – Original Draft: A.R-H. and A.R.; Writing – Review & Editing: A.R-  
816 H., A.R., M.C., A.F., T.S., V.J.S., I.I.K, B.A-P., and S.C.; Visualization: A.R-H.; Supervision: A.R. and T.S.;  
817 Project Administration: A.R-H. and A.R.; Funding Acquisition: A.R. and T.S.

## 818 Acknowledgments

819 We would like to thank Anisha Keshavan for useful discussions of community science and web-  
820 based quality control and for her work on SwipesForScience. This manuscript was prepared using  
821 a limited access dataset obtained from the Child Mind Institute Biobank, The Healthy Brain Net-  
822 work dataset. This manuscript reflects the views of the authors and does not necessarily reflect  
823 the opinions or views of the Child Mind Institute. This work was supported via BRAIN Initiative  
824 grant 1RF1MH121868-01 from the National Institutes of Mental Health. Additional support was  
825 provided by grant 1R01EB027585-01 from the National Institutes of Biomedical Imaging and Bio-  
826 engineering (PI: Eleftherios Garyfallidis). Additional support was provided by R01MH120482 and  
827 the Penn/CHOP Lifespan Brain Institute.

## 828 References

- 829 **Abadi M**, Agarwal A, Barham P, Brevdo E, Chen Z, Citro C, Corrado GS, Davis A, Dean J, Devin M, Ghemawat  
830 S, Goodfellow I, Harp A, Irving G, Isard M, Jia Y, Jozefowicz R, Kaiser L, Kudlur M, Levenberg J, et al., Tensor-  
831 Flow: Large-Scale Machine Learning on Heterogeneous Systems; 2015. <https://www.tensorflow.org/>, software  
832 available from tensorflow.org.
- 833 **Abraham A**, Pedregosa F, Eickenberg M, Gervais P, Mueller A, Kossaifi J, Gramfort A, Thirion B, Varoquaux G.  
834 Machine learning for neuroimaging with scikit-learn. *Frontiers in Neuroinformatics*. 2014; 8. [https://www.](https://www.frontiersin.org/articles/10.3389/fninf.2014.00014/full)  
835 [frontiersin.org/articles/10.3389/fninf.2014.00014/full](https://www.frontiersin.org/articles/10.3389/fninf.2014.00014/full), doi: 10.3389/fninf.2014.00014.
- 836 **Alexander LM**, Escalera J, Ai L, Andreotti C, Febre K, Mangone A, Vega-Potler N, Langer N, Alexander A, Kovacs  
837 M, Litke S, O'Hagan B, Andersen J, Bronstein B, Bui A, Bushey M, Butler H, Castagna V, Camacho N, Chan  
838 E, et al. An open resource for transdiagnostic research in pediatric mental health and learning disorders.  
839 *Scientific Data*. 2017 Dec; 4:170181. <https://doi.org/10.1038/sdata.2017.181>, doi: 10.1038/sdata.2017.181.
- 840 **Allen L**, Scott J, Brand A, Hlava M, Altman M. Publishing: Credit where credit is due. *Nature*. 2014 Apr;  
841 508(7496):312–313. <http://dx.doi.org/10.1038/508312a>, doi: 10.1038/508312a.
- 842 **Ancona M**, Ceolini E, Öztireli C, Gross M. Gradient-Based Attribution Methods. In: Samek W, Montavon G,  
843 Vedaldi A, Hansen LK, Müller KR, editors. *Explainable AI: Interpreting, Explaining and Visualizing Deep Learning*  
844 Cham: Springer International Publishing; 2019.p. 169–191. [https://doi.org/10.1007/978-3-030-28954-6\\_9](https://doi.org/10.1007/978-3-030-28954-6_9),  
845 doi: 10.1007/978-3-030-28954-6\_9.

- 846 **Andersson JL**, Graham MS, Zsoldos E, Sotiropoulos SN. Incorporating outlier detection and replacement into  
847 a non-parametric framework for movement and distortion correction of diffusion MR images. *Neuroimage*.  
848 2016; 141:556–572.
- 849 **Andersson JL**, Skare S, Ashburner J. How to correct susceptibility distortions in spin-echo echo-planar images:  
850 application to diffusion tensor imaging. *Neuroimage*. 2003; 20(2):870–888.
- 851 **Andersson JL**, Sotiropoulos SN. An integrated approach to correction for off-resonance effects and subject  
852 movement in diffusion MR imaging. *Neuroimage*. 2016; 125:1063–1078.
- 853 **Avants BB**, Epstein CL, Grossman M, Gee JC. Symmetric diffeomorphic image registration with cross-  
854 correlation: Evaluating automated labeling of elderly and neurodegenerative brain. *Medical Image*  
855 *Analysis*. 2008; 12(1):26–41. <http://www.sciencedirect.com/science/article/pii/S1361841507000606>, doi:  
856 [10.1016/j.media.2007.06.004](https://doi.org/10.1016/j.media.2007.06.004).
- 857 **Avesani P**, McPherson B, Hayashi S, Caiafa CF, Henschel R, Garyfallidis E, Kitchell L, Bullock D, Patterson A,  
858 Olivetti E, Sporns O, Saykin AJ, Wang L, Dinov I, Hancock D, Caron B, Qian Y, Pestilli F. The open diffusion data  
859 derivatives, brain data upcycling via integrated publishing of derivatives and reproducible open cloud ser-  
860 vices. *Scientific data*. 2019 May; 6(1):69. <http://dx.doi.org/10.1038/s41597-019-0073-y>, doi: 10.1038/s41597-  
861 019-0073-y.
- 862 **Bells S**, Cercignani M, Deoni S, Assaf Y, Pasternak O, Evans C, Leemans A, Jones D. Tractometry–comprehensive  
863 multi-modal quantitative assessment of white matter along specific tracts. In: *Proc. ISMRM*, vol. 678; 2011.  
864 p. 1.
- 865 **Brand A**, Allen L, Altman M, Hlava M, Scott J. Beyond authorship: attribution, contribution, collaboration, and  
866 credit. *Learned publishing: journal of the Association of Learned and Professional Society Publishers*. 2015  
867 Apr; 28(2):151–155. <http://doi.wiley.com/10.1087/20150211>, doi: 10.1087/20150211.
- 868 **Chen T**, Guestrin C. XGBoost: A Scalable Tree Boosting System. In: *Proceedings of the 22nd ACM SIGKDD Interna-*  
869 *tional Conference on Knowledge Discovery and Data Mining KDD '16*, New York, NY, USA: Association for Comput-  
870 ing Machinery; 2016. p. 785–794. <https://doi.org/10.1145/2939672.2939785>, doi: 10.1145/2939672.2939785.
- 871 **Chen T**, Guestrin C. XGBoost: A Scalable Tree Boosting System. In: *Proceedings of the 22nd ACM SIGKDD Interna-*  
872 *tional Conference on Knowledge Discovery and Data Mining KDD '16*, New York, NY, USA: ACM; 2016. p. 785–794.  
873 <http://doi.acm.org/10.1145/2939672.2939785>, doi: 10.1145/2939672.2939785.
- 874 **Chollet F**, et al., Keras; 2015. <https://keras.io>.
- 875 **Cicchetti DV**. Guidelines, criteria, and rules of thumb for evaluating normed and standardized assessment  
876 instruments in psychology. *Psychol Assess*. 1994 Dec; 6(4):284–290.
- 877 **Cieslak M**, Cook PA, He X, Yeh FC, Dhollander T, Adebimpe A, Aguirre GK, Bassett DS, Betzel RF, Bourque J,  
878 Cabral LM, Davatzikos C, Detre JA, Earl E, Elliott MA, Fadnavis S, Fair DA, Foran W, Fotiadis P, Garyfallidis E,  
879 et al. QSIprep: an integrative platform for preprocessing and reconstructing diffusion MRI data. *Nature*  
880 *methods*. 2021 Jul; 18(7):775–778. <http://dx.doi.org/10.1038/s41592-021-01185-5>, doi: 10.1038/s41592-021-  
881 01185-5.
- 882 **Colby JB**, Soderberg L, Lebel C, Dinov ID, Thompson PM, Sowell ER. Along-tract statistics allow for enhanced  
883 tractography analysis. *NeuroImage*. 2012 Feb; 59(4):3227–3242. [http://www.sciencedirect.com/science/article/](http://www.sciencedirect.com/science/article/pii/S1053811911012833)  
884 [pii/S1053811911012833](http://www.sciencedirect.com/science/article/pii/S1053811911012833), doi: 10.1016/j.neuroimage.2011.11.004.
- 885 **Cole JH**, Marioni RE, Harris SE, Deary IJ. Brain age and other bodily ‘ages’: implications for neuropsychi-  
886 atry. *Molecular psychiatry*. 2019 Feb; 24(2):266–281. <http://dx.doi.org/10.1038/s41380-018-0098-1>, doi:  
887 10.1038/s41380-018-0098-1.
- 888 **Covitz S**, Tapera T, Adebimpe A, Ai L, Alexander-Bloch A, Bertolero M, Fair D, Feczko E, Franco A, Gur R, Gur  
889 R, Hendrickson T, Houghton A, Mehta K, Murtha K, Perrone A, Robert-Fitzgerald T, Schabdach J, Shinohara  
890 R, Vogel J, et al. Curation of BIDS (CuBIDS): a sanity-preserving workflow and software package for curating  
891 large BIDS datasets; 2022, in preparation.
- 892 **Cox RW**, Ashburner J, Breman H, Fissell K, Haselgrove C, Holmes CJ, Lancaster JL, Rex DE, Smith SM, Woodward  
893 JB, Strother SC. A (sort of) new image data format standard: NiFTI-1. In: *10th Annual Meeting of the Organization*  
894 *for Human Brain Mapping*; 2004. [https://nifti.nimh.nih.gov/nifti-1/documentation/hbm\\_nifti\\_2004.pdf](https://nifti.nimh.nih.gov/nifti-1/documentation/hbm_nifti_2004.pdf).
- 895 **Dhollander T**, Mito R, Raffelt D, Connelly A. Improved white matter response function estimation for 3-tissue  
896 constrained spherical deconvolution. In: *Proc. Intl. Soc. Mag. Reson. Med*; 2019. p. 555.

- 897 **Dhollander T**, Raffelt D, Connelly A. Unsupervised 3-tissue response function estimation from single-shell or  
898 multi-shell diffusion MR data without a co-registered T1 image. In: *ISMRM Workshop on Breaking the Barriers*  
899 *of Diffusion MRI*, vol. 5; 2016. p. 5.
- 900 **Di Eugenio B**, Glass M. The kappa statistic: a second look. *Computational Linguistics*. 2004 Mar; 30(1):95–101.  
901 <https://doi.org/10.1162/089120104773633402>, doi: 10.1162/089120104773633402.
- 902 **Dicente Cid Y**, Liauchuk V, Klimuk D, Tarasau A, Kovalev V, Müller H. Overview of ImageCLEFtuberculosis 2019  
903 - Automatic CT-based Report Generation and Tuberculosis Severity Assessment. In: *CLEF*; 2019. .
- 904 **Esteban O**, Birman D, Schaer M, Koyejo OO, Poldrack RA, Gorgolewski KJ. MRIQC: Advancing the automatic  
905 prediction of image quality in MRI from unseen sites. *PloS one*. 2017 Sep; 12(9):e0184661. [http://dx.doi.org/](http://dx.doi.org/10.1371/journal.pone.0184661)  
906 [10.1371/journal.pone.0184661](http://dx.doi.org/10.1371/journal.pone.0184661), doi: 10.1371/journal.pone.0184661.
- 907 **Fair DA**, Dosenbach NU, Moore AH, Satterthwaite T, Milham MP. Developmental Cognitive Neuroscience in  
908 the Era of Networks and Big Data: Strengths, Weaknesses, Opportunities, and Threats. *Annual Review of*  
909 *Developmental Psychology*. 2021; 3.
- 910 **Fair DA**, Nigg JT, Iyer S, Bathula D, Mills KL, Dosenbach NUF, Schlaggar BL, Mennes M, Gutman D, Bangaru  
911 S, Buitelaar JK, Dickstein DP, Di Martino A, Kennedy DN, Kelly C, Luna B, Schweitzer JB, Velanova K, Wang  
912 YF, Mostofsky S, et al. Distinct neural signatures detected for ADHD subtypes after controlling for micro-  
913 movements in resting state functional connectivity MRI data. *Frontiers in systems neuroscience*. 2012; 6:80.  
914 <http://dx.doi.org/10.3389/fnsys.2012.00080>, doi: 10.3389/fnsys.2012.00080.
- 915 **Fonov VS**, Evans AC, McKinstry RC, Almlí CR, Collins DL. Unbiased nonlinear average age-appropriate brain  
916 templates from birth to adulthood. *Neuroimage*. 2009 Jul; 47:S102.
- 917 **Fonov V**, Evans A, McKinstry R, Almlí C, Collins D. Unbiased nonlinear average age-appropriate brain templates  
918 from birth to adulthood. *NeuroImage*. 2009; 47, Supplement 1:S102. [http://www.sciencedirect.com/science/](http://www.sciencedirect.com/science/article/pii/S1053811909708845)  
919 [article/pii/S1053811909708845](http://www.sciencedirect.com/science/article/pii/S1053811909708845), doi: 10.1016/S1053-8119(09)70884-5.
- 920 **Fortin JP**, Cullen N, Sheline YI, Taylor WD, Aselcioglu I, Cook PA, Adams P, Cooper C, Fava M, McGrath PJ, McInnis  
921 M, Phillips ML, Trivedi MH, Weissman MM, Shinohara RT. Harmonization of cortical thickness measurements  
922 across scanners and sites. *NeuroImage*. 2018 Feb; 167:104–120. [http://dx.doi.org/10.1016/j.neuroimage.2017.](http://dx.doi.org/10.1016/j.neuroimage.2017.11.024)  
923 [11.024](http://dx.doi.org/10.1016/j.neuroimage.2017.11.024), doi: 10.1016/j.neuroimage.2017.11.024.
- 924 **Fortin JP**, Parker D, Tunç B, Watanabe T, Elliott MA, Ruparel K, Roalf DR, Satterthwaite TD, Gur RC,  
925 Gur RE, Schultz RT, Verma R, Shinohara RT. Harmonization of multi-site diffusion tensor imaging  
926 data. *NeuroImage*. 2017 Nov; 161:149–170. <http://dx.doi.org/10.1016/j.neuroimage.2017.08.047>, doi:  
927 [10.1016/j.neuroimage.2017.08.047](http://dx.doi.org/10.1016/j.neuroimage.2017.08.047).
- 928 **Foster ED MSLS**, Deardorff A MLIS. Open Science Framework (OSF). *Journal of the Medical Library Association:*  
929 *JMLA*. 2017 Apr; 105(2). <http://jmla.pitt.edu/ojs/jmla/article/view/88>, doi: 10.5195/jmla.2017.88.
- 930 **Franke K**, Ziegler G, Klöppel S, Gaser C, Alzheimer's Disease Neuroimaging Initiative. Estimating the age of  
931 healthy subjects from T1-weighted MRI scans using kernel methods: exploring the influence of various pa-  
932 rameters. *NeuroImage*. 2010 Apr; 50(3):883–892. <http://dx.doi.org/10.1016/j.neuroimage.2010.01.005>, doi:  
933 [10.1016/j.neuroimage.2010.01.005](http://dx.doi.org/10.1016/j.neuroimage.2010.01.005).
- 934 **Garyfallidis E**, Brett M, Amirbekian B, Rokem A, Van Der Walt S, Descoteaux M, Nimmo-Smith I. DIPY, a library  
935 for the analysis of diffusion MRI data. *Frontiers in neuroinformatics*. 2014; 8:8.
- 936 **Ghassemi M**, Oakden-Rayner L, Beam AL. The false hope of current approaches to explainable artificial in-  
937 telligence in health care. *The Lancet Digital health*. 2021 Nov; 3(11):e745–e750. [http://dx.doi.org/10.1016/](http://dx.doi.org/10.1016/S2589-7500(21)00208-9)  
938 [S2589-7500\(21\)00208-9](http://dx.doi.org/10.1016/S2589-7500(21)00208-9), doi: 10.1016/S2589-7500(21)00208-9.
- 939 **Glasser MF**, Sotiropoulos SN, Wilson JA, Coalson TS, Fischl B, Andersson JL, Xu J, Jbabdi S, Webster M, Polimeni JR,  
940 Van Essen DC, Jenkinson M, WU-Minn HCP Consortium. The minimal preprocessing pipelines for the Human  
941 Connectome Project. *NeuroImage*. 2013 Oct; 80:105–124. <http://dx.doi.org/10.1016/j.neuroimage.2013.04.127>,  
942 [doi: 10.1016/j.neuroimage.2013.04.127](http://dx.doi.org/10.1016/j.neuroimage.2013.04.127).
- 943 **Gorgolewski K**, Burns CD, Madison C, Clark D, Halchenko YO, Waskom ML, Ghosh S. Nipype: a flexible,  
944 lightweight and extensible neuroimaging data processing framework in Python. *Frontiers in Neuroinfor-*  
945 *matics*. 2011; 5:13. doi: 10.3389/fninf.2011.00013.

- 946 **Gorgolewski KJ**, Alfaro-Almagro F, Auer T, Bellec P, Capotà M, Chakravarty MM, Churchill NW, Cohen AL, Crad-  
947 dock RC, Devenyi GA, Eklund A, Esteban O, Flandin G, Ghosh SS, Guntupalli JS, Jenkinson M, Keshavan A,  
948 Kiar G, Liem F, Raamana PR, et al. BIDS apps: Improving ease of use, accessibility, and reproducibility of  
949 neuroimaging data analysis methods. *PLoS Comput Biol*. 2017 Mar; 13(3):e1005209.
- 950 **Gorgolewski KJ**, Auer T, Calhoun VD, Craddock RC, Das S, Duff EP, Flandin G, Ghosh SS, Glatard T, Halchenko  
951 YO, Handwerker DA, Hanke M, Keator D, Li X, Michael Z, Maumet C, Nichols BN, Nichols TE, Pellman J, Pol-  
952 line JB, et al. The brain imaging data structure, a format for organizing and describing outputs of neu-  
953 roimaging experiments. *Scientific data*. 2016 Jun; 3:160044. <http://dx.doi.org/10.1038/sdata.2016.44>, doi:  
954 [10.1038/sdata.2016.44](https://doi.org/10.1038/sdata.2016.44).
- 955 **Gorgolewski KJ**, Esteban O, Markiewicz CJ, Ziegler E, Ellis DG, Notter MP, Jarecka D, Johnson H, Burns C,  
956 Manhães-Savio A, Hamalainen C, Yvernault B, Salo T, Jordan K, Goncalves M, Waskom M, Clark D, Wong J,  
957 Loney F, Modat M, et al. Nipype. *Software*. 2018; doi: [10.5281/zenodo.596855](https://doi.org/10.5281/zenodo.596855).
- 958 **Halchenko YO**, Meyer K, Poldrack B, Solanky DS, Wagner AS, Gors J, MacFarlane D, Pustina D, Sochat V,  
959 Ghosh SS, Mönch C, Markiewicz CJ, Waite L, Shlyakhter I, de la Vega A, Hayashi S, Häusler CO, Poline JB,  
960 Kadelka T, Skytén K, et al. DataLad: distributed system for joint management of code, data, and their re-  
961 lationship. *Journal of Open Source Software*. 2021; 6(63):3262. <https://doi.org/10.21105/joss.03262>, doi:  
962 [10.21105/joss.03262](https://doi.org/10.21105/joss.03262).
- 963 **Hallgren KA**. Computing Inter-Rater Reliability for Observational Data: An Overview and Tutorial. *Tutorials*  
964 *in quantitative methods for psychology*. 2012; 8(1):23–34. <http://dx.doi.org/10.20982/tqmp.08.1.p023>, doi:  
965 [10.20982/tqmp.08.1.p023](https://doi.org/10.20982/tqmp.08.1.p023).
- 966 **Harris CR**, Millman KJ, van der Walt SJ, Gommers R, Virtanen P, Cournapeau D, Wieser E, Taylor J, Berg S, Smith  
967 NJ, Kern R, Picus M, Hoyer S, van Kerkwijk MH, Brett M, Haldane A, del Río JF, Wiebe M, Peterson P, Gérard-  
968 Marchant P, et al. Array programming with NumPy. *Nature*. 2020 Sep; 585(7825):357–362. [https://doi.org/](https://doi.org/10.1038/s41586-020-2649-2)  
969 [10.1038/s41586-020-2649-2](https://doi.org/10.1038/s41586-020-2649-2), doi: [10.1038/s41586-020-2649-2](https://doi.org/10.1038/s41586-020-2649-2).
- 970 **Head T**, Kumar M, Nahrstaedt H, Louppe G, Shcherbaty I, scikit-optimize/scikit-optimize. *Zenodo*; 2021. <https://doi.org/10.5281/zenodo.5565057>, doi: [10.5281/zenodo.5565057](https://doi.org/10.5281/zenodo.5565057).
- 972 **Henriques RN**, Correia MM, Marrale M, Huber E, Kruper J, Koudoro S, Yeatman JD, Garyfallidis E, Rokem A.  
973 Diffusional Kurtosis Imaging in the Diffusion Imaging in Python Project. *Front Hum Neurosci*. 2021; 15:390.
- 974 **Hua K**, Zhang J, Wakana S, Jiang H, Li X, Reich DS, Calabresi PA, Pekar JJ, van Zijl PCM, Mori S. Tract  
975 probability maps in stereotaxic spaces: analyses of white matter anatomy and tract-specific quantifi-  
976 cation. *NeuroImage*. 2008 Jan; 39(1):336–347. <http://dx.doi.org/10.1016/j.neuroimage.2007.07.053>, doi:  
977 [10.1016/j.neuroimage.2007.07.053](https://doi.org/10.1016/j.neuroimage.2007.07.053).
- 978 **Hunter JD**. Matplotlib: A 2D graphics environment. *Computing in Science & Engineering*. 2007; 9(3):90–95. doi:  
979 [10.1109/MCSE.2007.55](https://doi.org/10.1109/MCSE.2007.55).
- 980 **J-Donald**, Smith R, Raffelt D, Tabbara R, Dhollander T, Pietsch M, Christiaens D, Jeurissen B, Yeh CH, Connelly  
981 A. MRtrix3: A fast, flexible and open software framework for medical image processing and visualisation.  
982 *NeuroImage*. 2019; 202:116137.
- 983 **Jensen JH**, Helpert JA, Ramani A, Lu H, Kaczynski K. Diffusional kurtosis imaging: the quantification of non-  
984 gaussian water diffusion by means of magnetic resonance imaging. *Magnetic resonance in medicine: official*  
985 *journal of the Society of Magnetic Resonance in Medicine / Society of Magnetic Resonance in Medicine*. 2005  
986 Jun; 53(6):1432–1440. <http://dx.doi.org/10.1002/mrm.20508>, doi: [10.1002/mrm.20508](https://doi.org/10.1002/mrm.20508).
- 987 **Jernigan TL**, Brown SA. Introduction. *Developmental cognitive neuroscience*. 2018; 32:1–3. [http://www.](http://www.sciencedirect.com/science/article/pii/S1878929317301883)  
988 [sciencedirect.com/science/article/pii/S1878929317301883](https://doi.org/10.1016/j.dcn.2018.02.002), doi: [10.1016/j.dcn.2018.02.002](https://doi.org/10.1016/j.dcn.2018.02.002).
- 989 **Johnson WE**, Li C, Rabinovic A. Adjusting batch effects in microarray expression data using empirical  
990 Bayes methods. *Biostatistics*. 2007 Jan; 8(1):118–127. <http://dx.doi.org/10.1093/biostatistics/kxj037>, doi:  
991 [10.1093/biostatistics/kxj037](https://doi.org/10.1093/biostatistics/kxj037).
- 992 **Jones DK**, Cercignani M. Twenty-five pitfalls in the analysis of diffusion MRI data. *NMR in biomedicine*. 2010  
993 Aug; 23(7):803–820. <http://dx.doi.org/10.1002/nbm.1543>, doi: [10.1002/nbm.1543](https://doi.org/10.1002/nbm.1543).
- 994 **Jones DK**, Travis AR, Eden G, Pierpaoli C, Basser PJ. PASTA: pointwise assessment of streamline tractography  
995 attributes. *Magnetic resonance in medicine: official journal of the Society of Magnetic Resonance in Medicine*  
996 */ Society of Magnetic Resonance in Medicine*. 2005 Jun; 53(6):1462–1467. [http://dx.doi.org/10.1002/mrm.](http://dx.doi.org/10.1002/mrm.20484)  
997 [20484](https://doi.org/10.1002/mrm.20484), doi: [10.1002/mrm.20484](https://doi.org/10.1002/mrm.20484).

- 998 **Kaczmarzyk J**, McClure P, Zulfikar W, Rana A, Rajaei H, Richie-Halford A, Bansal S, Jarecka D, Lee J, Ghosh  
999 S, *neuronets/nobrainer*: 0.2.0. Zenodo; 2021. <https://doi.org/10.5281/zenodo.5803350>, doi: 10.5281/zeno-  
1000 odo.5803350.
- 1001 **Keshavan A**, Yeatman JD, Rokem A. Combining Citizen Science and Deep Learning to Amplify Expertise in  
1002 Neuroimaging. *Frontiers in neuroinformatics*. 2019 May; 13:29. <http://dx.doi.org/10.3389/fninf.2019.00029>,  
1003 doi: 10.3389/fninf.2019.00029.
- 1004 **Kingma DP**, Ba J, Adam: A Method for Stochastic Optimization; 2017.
- 1005 **Kluyver T**, Ragan-Kelley B, Pérez F, Granger B, Bussonnier M, Frederic J, Kelley K, Hamrick J, Grout J, Corlay S,  
1006 Ivanov P, Avila D, Abdalla S, Willing C, Jupyter Development Team. Jupyter Notebooks – a publishing format  
1007 for reproducible computational workflows. In: *Positioning and Power in Academic Publishing: Players, Agents*  
1008 *and Agendas* Amsterdam, NY: IOS Press; 2016.p. 87–90. <https://ebooks.iospress.nl/publication/42900>, doi:  
1009 10.3233/978-1-61499-649-1-87.
- 1010 **Kruper J**, Yeatman JD, Richie-Halford A, Bloom D, Grotheer M, Caffarra S, Kiar G, Karipidis II, Roy E, Chan-  
1011 dio BQ, Garyfallidis E, Rokem A. Evaluating the reliability of human brain white matter tractome-  
1012 try. *Aperture Neuro*. 2021 Oct; <https://www.biorxiv.org/content/early/2021/02/24/2021.02.24.432740>, doi:  
1013 10.1101/2021.02.24.432740.
- 1014 **Laird AR**. Large, open datasets for human connectomics research: Considerations for reproducible and re-  
1015 sponsible data use. *NeuroImage*. 2021 Dec; 244:118579. <http://dx.doi.org/10.1016/j.neuroimage.2021.118579>,  
1016 doi: 10.1016/j.neuroimage.2021.118579.
- 1017 **Lebel C**, Deoni S. The development of brain white matter microstructure. *Neuroimage*. 2018 Nov; 182:207–218.
- 1018 **LeCun Y**, Bengio Y, Hinton G. Deep learning. *Nature*. 2015 May; 521(7553):436–444. [http://dx.doi.org/10.1038/](http://dx.doi.org/10.1038/nature14539)  
1019 [nature14539](http://dx.doi.org/10.1038/nature14539), doi: 10.1038/nature14539.
- 1020 **Lipton ZC**, The Doctor Just Won't Accept That!; 2017. <http://arxiv.org/abs/1711.08037>.
- 1021 **Lundberg SM**, Erion G, Chen H, DeGrave A, Prutkin JM, Nair B, Katz R, Himmelfarb J, Bansal N, Lee SI. From  
1022 Local Explanations to Global Understanding with Explainable AI for Trees. *Nature machine intelligence*. 2020  
1023 Jan; 2(1):56–67. <http://dx.doi.org/10.1038/s42256-019-0138-9>, doi: 10.1038/s42256-019-0138-9.
- 1024 **Lundberg SM**, Lee SI. A Unified Approach to Interpreting Model Predictions. In: Guyon I, Luxburg  
1025 UV, Bengio S, Wallach H, Fergus R, Vishwanathan S, Garnett R, editors. *Advances in Neural Informa-*  
1026 *tion Processing Systems 30* Curran Associates, Inc.; 2017.p. 4765–4774. [http://papers.nips.cc/paper/](http://papers.nips.cc/paper/7062-a-unified-approach-to-interpreting-model-predictions.pdf)  
1027 [7062-a-unified-approach-to-interpreting-model-predictions.pdf](http://papers.nips.cc/paper/7062-a-unified-approach-to-interpreting-model-predictions.pdf).
- 1028 **McKinney W**. Data Structures for Statistical Computing in Python. In: Stéfan van der Walt, Jarrod Millman,  
1029 editors. *Proceedings of the 9th Python in Science Conference*; 2010. p. 56–61. doi: 10.25080/Majora-92bf1922-  
1030 00a.
- 1031 **Mehta P**, Petersen CA, Wen JC, Banitt MR, Chen PP, Bojikian KD, Egan C, Lee SI, Balazinska M, Lee AY, Rokem A.  
1032 Automated detection of glaucoma with interpretable machine learning using clinical data and multi-modal  
1033 retinal images. *Am J Ophthalmol*. 2021 May; .
- 1034 **Mennes M**, Biswal BB, Castellanos FX, Milham MP. Making data sharing work: the FCP/INDI experi-  
1035 ence. *NeuroImage*. 2013 Nov; 82:683–691. <http://dx.doi.org/10.1016/j.neuroimage.2012.10.064>, doi:  
1036 10.1016/j.neuroimage.2012.10.064.
- 1037 **Merkel D**. Docker: lightweight linux containers for consistent development and deployment. *Linux journal*.  
1038 2014; 2014(239):2.
- 1039 **Miller KL**, Alfaro-Almagro F, Bangerter NK, Thomas DL, Yacoub E, Xu J, Bartsch AJ, Jbabdi S, Sotiropoulos SN,  
1040 Andersson JLR, Griffanti L, Douaud G, Okell TW, Weale P, Dragonu I, Garratt S, Hudson S, Collins R, Jenkin-  
1041 son M, Matthews PM, et al. Multimodal population brain imaging in the UK Biobank prospective epidemi-  
1042 ological study. *Nature neuroscience*. 2016 Nov; 19(11):1523–1536. <http://dx.doi.org/10.1038/nn.4393>, doi:  
1043 10.1038/nn.4393.
- 1044 **Murdoch WJ**, Singh C, Kumbier K, Abbasi-Asl R, Yu B. Definitions, methods, and applications in interpretable  
1045 machine learning. *Proceedings of the National Academy of Sciences*. 2019; 116(44):22071–22080. <https://www.pnas.org/content/116/44/22071>, doi: 10.1073/pnas.1900654116.  
1046 <https://www.pnas.org/content/116/44/22071>, doi: 10.1073/pnas.1900654116.



- 1047 **Nelson PG**, Promislow DEL, Masel J. Biomarkers for Aging Identified in Cross-sectional Studies Tend  
1048 to Be Non-causative. *The journals of gerontology Series A, Biological sciences and medical sciences.*  
1049 2020 Feb; 75(3):466–472. <http://academic.oup.com/biomedgerontology/article/75/3/466/5540066>, doi:  
1050 10.1093/gerona/glz174.
- 1051 **Nielson DM**, Pereira F, Zheng CY, Migineishvili N, Lee JA, Thomas AG, Bandettini PA. Detecting and harmonizing  
1052 scanner differences in the ABCD study - annual release 1.0. *bioRxiv.* 2018; [https://www.biorxiv.org/content/](https://www.biorxiv.org/content/early/2018/05/02/309260)  
1053 [early/2018/05/02/309260](https://www.biorxiv.org/content/early/2018/05/02/309260), doi: 10.1101/309260.
- 1054 **O'Donnell LJ**, Westin CF, Golby AJ. Tract-based morphometry for white matter group analysis.  
1055 *NeuroImage.* 2009 Apr; 45(3):832–844. <http://dx.doi.org/10.1016/j.neuroimage.2008.12.023>, doi:  
1056 [10.1016/j.neuroimage.2008.12.023](https://doi.org/10.1016/j.neuroimage.2008.12.023).
- 1057 **Paus T.** Population neuroscience: why and how. *Hum Brain Mapp.* 2010 Jun; 31(6):891–903.
- 1058 **Paus T**, Keshavan M, Giedd JN. Why do many psychiatric disorders emerge during adolescence? *Nat Rev*  
1059 *Neurosci.* 2008 Dec; 9(12):947–957.
- 1060 **Pedregosa F**, Varoquaux G, Gramfort A, Michel V, Thirion B, Grisel O, Blondel M, Prettenhofer P, Weiss R,  
1061 Dubourg V, Vanderplas J, Passos A, Cournapeau D, Brucher M, Perrot M, Duchesnay E. Scikit-learn: Machine  
1062 Learning in Python. *Journal of Machine Learning Research.* 2011; 12:2825–2830.
- 1063 **Pestilli F**, Poldrack R, Rokem A, Satterthwaite T, Feingold F, Duff E, Pernet C, Smith R, Esteban O, Cieslak M, A  
1064 community-driven development of the Brain Imaging Data Standard (BIDS) to describe macroscopic brain  
1065 connections. *OSF;* 2021. [osf.io/u4g5p](https://osf.io/u4g5p), doi: 10.17605/OSF.IO/U4G5P.
- 1066 **Pinaya WHL**, NeuroCombat-sklearn; 2020. [https://github.com/Warvito/neurocombat\\_sklearn](https://github.com/Warvito/neurocombat_sklearn).
- 1067 **Power JD**, Barnes KA, Snyder AZ, Schlaggar BL, Petersen SE. Spurious but systematic correlations in functional  
1068 connectivity MRI networks arise from subject motion. *NeuroImage.* 2012 Feb; 59(3):2142–2154. [http://dx.](http://dx.doi.org/10.1016/j.neuroimage.2011.10.018)  
1069 [doi.org/10.1016/j.neuroimage.2011.10.018](https://doi.org/10.1016/j.neuroimage.2011.10.018), doi: 10.1016/j.neuroimage.2011.10.018.
- 1070 **Power JD**, Mitra A, Laumann TO, Snyder AZ, Schlaggar BL, Petersen SE. Methods to detect, characterize, and  
1071 remove motion artifact in resting state fMRI. *NeuroImage.* 2014; 84(Supplement C):320–341. [http://www.](http://www.sciencedirect.com/science/article/pii/S1053811913009117)  
1072 [sciencedirect.com/science/article/pii/S1053811913009117](https://www.sciencedirect.com/science/article/pii/S1053811913009117), doi: 10.1016/j.neuroimage.2013.08.048.
- 1073 **Raffelt D**, Dhollander T, Tournier JD, Tabbara R, Smith RE, Pierre E, Connelly A. Bias field correction and intensity  
1074 normalisation for quantitative analysis of apparent fibre density. In: *Proc. Intl. Soc. Mag. Reson. Med*, vol. 25;  
1075 2017. p. 3541.
- 1076 **Richie-Halford A**, Keshavan A, Cieslak M, Esteban O, Yeatman J, Rokem A. dmriprep-viewer: a web application  
1077 for quality control of large neuroimaging datasets; 2022, in preparation.
- 1078 **Richie-Halford A**, Rokem A. Cloudknot: A Python Library to Run your Existing Code on AWS Batch. *Proceedings*  
1079 *of the 17th Python in Science Conference.* 2018; p. 8–14. [http://conference.scipy.org/proceedings/scipy2018/](http://conference.scipy.org/proceedings/scipy2018/adam_richie-halford.html)  
1080 [adam\\_richie-halford.html](http://conference.scipy.org/proceedings/scipy2018/adam_richie-halford.html), doi: 10.25080/Majora-4af1f417-001.
- 1081 **Richie-Halford A**, Rokem A, HBN-POD2 QC. *OSF;* 2021. [osf.io/8cy32](https://osf.io/8cy32), doi: 10.17605/OSF.IO/8CY32.
- 1082 **Richie-Halford A**, Rokem A, HBN-POD2-QC: Code accompanying the HBN-POD2 manuscript. *Zenodo;* 2022.  
1083 <https://doi.org/10.5281/zenodo.5949280>, doi: 10.5281/zenodo.5949280.
- 1084 **Richie-Halford A**, Rokem A, QSIQC: Predict diffusion MRI quality ratings. *Zenodo;* 2022. [https://doi.org/10.](https://doi.org/10.5281/zenodo.5949269)  
1085 [5281/zenodo.5949269](https://doi.org/10.5281/zenodo.5949269), doi: 10.5281/zenodo.5949269.
- 1086 **Richie-Halford A**, Rokem A, Simon N, Yeatman J, richford/AFQ-Insight: AFQ-Insight. *Zenodo;* 2019. [https://doi.](https://doi.org/10.5281/zenodo.3585942)  
1087 [org/10.5281/zenodo.3585942](https://doi.org/10.5281/zenodo.3585942), doi: 10.5281/zenodo.3585942.
- 1088 **Richie-Halford A**, Yeatman JD, Simon N, Rokem A. Multidimensional analysis and detection of informative  
1089 features in human brain white matter. *PLoS computational biology.* 2021 Jun; 17(6):e1009136. [http://dx.doi.](http://dx.doi.org/10.1371/journal.pcbi.1009136)  
1090 [org/10.1371/journal.pcbi.1009136](https://doi.org/10.1371/journal.pcbi.1009136), doi: 10.1371/journal.pcbi.1009136.
- 1091 **Rosen AFG**, Roalf DR, Ruparel K, Blake J, Seelaus K, Villa LP, Ciric R, Cook PA, Davatzikos C, Elliott MA, Garcia de  
1092 La Garza A, Gennatas ED, Quarmley M, Schmitt JE, Shinohara RT, Tisdall MD, Craddock RC, Gur RE, Gur RC,  
1093 Satterthwaite TD. Quantitative assessment of structural image quality. *NeuroImage.* 2018 Apr; 169:407–418.  
1094 <http://dx.doi.org/10.1016/j.neuroimage.2017.12.059>, doi: 10.1016/j.neuroimage.2017.12.059.

- 1095 **Salahuddin Z**, Woodruff HC, Chatterjee A, Lambin P. Transparency of deep neural networks  
1096 for medical image analysis: A review of interpretability methods. *Computers in biology and*  
1097 *medicine*. 2022 Jan; 140:105111. <https://www.sciencedirect.com/science/article/pii/S0010482521009057>, doi:  
1098 [10.1016/j.compbimed.2021.105111](https://doi.org/10.1016/j.compbimed.2021.105111).
- 1099 **Satterthwaite TD**, Wolf DH, Loughead J, Ruparel K, Elliott MA, Hakonarson H, Gur RC, Gur RE. Impact of in-  
1100 scanner head motion on multiple measures of functional connectivity: relevance for studies of neurodevel-  
1101 opment in youth. *NeuroImage*. 2012 Mar; 60(1):623–632. <http://dx.doi.org/10.1016/j.neuroimage.2011.12.063>,  
1102 doi: [10.1016/j.neuroimage.2011.12.063](https://doi.org/10.1016/j.neuroimage.2011.12.063).
- 1103 **Sayres R**, Taly A, Rahimy E, Blumer K, Coz D, Hammel N, Krause J, Narayanaswamy A, Rastegar Z, Wu D, Xu S,  
1104 Barb S, Joseph A, Shumski M, Smith J, Sood AB, Corrado GS, Peng L, Webster DR. Using a Deep Learning Algo-  
1105 rithm and Integrated Gradients Explanation to Assist Grading for Diabetic Retinopathy. *Ophthalmology*. 2019  
1106 Apr; 126(4):552–564. <http://dx.doi.org/10.1016/j.ophtha.2018.11.016>, doi: [10.1016/j.ophtha.2018.11.016](https://doi.org/10.1016/j.ophtha.2018.11.016).
- 1107 **Shafto MA**, Tyler LK, Dixon M, Taylor JR, Rowe JB, Cusack R, Calder AJ, Marslen-Wilson WD, Duncan J, Dalgleish  
1108 T, Henson RN, Brayne C, Matthews FE, Cam-CAN. The Cambridge Centre for Ageing and Neuroscience (Cam-  
1109 CAN) study protocol: a cross-sectional, lifespan, multidisciplinary examination of healthy cognitive ageing.  
1110 *BMC neurology*. 2014 Oct; 14:204. <http://dx.doi.org/10.1186/s12883-014-0204-1>, doi: [10.1186/s12883-014-0204-1](https://doi.org/10.1186/s12883-014-0204-1).  
1111
- 1112 **Siegel JS**, Mitra A, Laumann TO, Seitzman BA, Raichle M, Corbetta M, Snyder AZ. Data Quality Influences Observed  
1113 Links Between Functional Connectivity and Behavior. *Cerebral cortex*. 2017 Sep; 27(9):4492–4502.  
1114 <http://dx.doi.org/10.1093/cercor/bhw253>, doi: [10.1093/cercor/bhw253](https://doi.org/10.1093/cercor/bhw253).
- 1115 **Sundararajan M**, Taly A, Yan Q. Axiomatic Attribution for Deep Networks. In: Precup D, Teh YW, editors. *Pro-*  
1116 *ceedings of the 34th International Conference on Machine Learning*, vol. 70 of Proceedings of Machine Learning  
1117 Research PMLR; 2017. p. 3319–3328. <https://proceedings.mlr.press/v70/sundararajan17a.html>.
- 1118 **Taylor JR**, Williams N, Cusack R, Auer T, Shafto MA, Dixon M, Tyler LK, Cam-Can, Henson RN. The Cambridge  
1119 Centre for Ageing and Neuroscience (Cam-CAN) data repository: Structural and functional MRI, MEG, and  
1120 cognitive data from a cross-sectional adult lifespan sample. *NeuroImage*. 2017 Jan; 144(Pt B):262–269. <http://dx.doi.org/10.1016/j.neuroimage.2015.09.018>, doi: [10.1016/j.neuroimage.2015.09.018](https://doi.org/10.1016/j.neuroimage.2015.09.018).  
1121
- 1122 **pandas development team T**, pandas-dev/pandas: Pandas. Zenodo; 2020. <https://doi.org/10.5281/zenodo.3509134>, doi: [10.5281/zenodo.3509134](https://doi.org/10.5281/zenodo.3509134).  
1123
- 1124 **TensorFlow Authors T**, Integrated gradients tutorial; 2021. Accessed: 2021-11-15. [https://www.tensorflow.org/tutorials/interpretability/integrated\\_gradients](https://www.tensorflow.org/tutorials/interpretability/integrated_gradients).  
1125
- 1126 **Tobe RH**, MacKay-Brandt A, Lim R, Kramer M, Breland MM, Trautman KD, Hu C, Sangoi R, Tu L, Alexan-  
1127 der L, Gabbay V, Castellanos FX, Leventhal BL, Craddock RC, Colcombe SJ, Franco AR, Milham MP. A  
1128 Longitudinal Resource for Studying Connectome Development and its Psychiatric Associations During  
1129 Childhood. *medRxiv*. 2021; <https://www.medrxiv.org/content/early/2021/03/12/2021.03.09.21253168>, doi:  
1130 [10.1101/2021.03.09.21253168](https://doi.org/10.1101/2021.03.09.21253168).
- 1131 **Tournier JD**, Calamante F, Gadian DG, Connelly A. Direct estimation of the fiber orientation density function  
1132 from diffusion-weighted MRI data using spherical deconvolution. *NeuroImage*. 2004; 23(3):1176–1185.
- 1133 **Tournier JD**, Yeh CH, Calamante F, Cho KH, Connelly A, Lin CP. Resolving crossing fibres using constrained  
1134 spherical deconvolution: validation using diffusion-weighted imaging phantom data. *NeuroImage*. 2008;  
1135 42(2):617–625.
- 1136 **Tustison NJ**, Avants BB, Cook PA, Zheng Y, Egan A, Yushkevich PA, Gee JC. N4ITK: Improved N3 Bias Correction.  
1137 *IEEE Transactions on Medical Imaging*. 2010; 29(6):1310–1320. doi: [10.1109/TMI.2010.2046908](https://doi.org/10.1109/TMI.2010.2046908).
- 1138 **Vallat R**. Pingouin: statistics in Python. *Journal of Open Source Software*. 2018; 3(31):1026. <https://doi.org/10.21105/joss.01026>, doi: [10.21105/joss.01026](https://doi.org/10.21105/joss.01026).  
1139
- 1140 **Van Essen DC**, Smith SM, Barch DM, Behrens TEJ, Yacoub E, Ugurbil K, WU-Minn HCP Consortium. The WU-  
1141 Minn Human Connectome Project: an overview. *NeuroImage*. 2013 Oct; 80:62–79. <http://dx.doi.org/10.1016/j.neuroimage.2013.05.041>, doi: [10.1016/j.neuroimage.2013.05.041](https://doi.org/10.1016/j.neuroimage.2013.05.041).  
1142
- 1143 **Velez DR**, White BC, Motsinger AA, Bush WS, Ritchie MD, Williams SM, Moore JH. A balanced accuracy function  
1144 for epistasis modeling in imbalanced datasets using multifactor dimensionality reduction. *Genetic epidemiol-*  
1145 *ogy*. 2007 May; 31(4):306–315. <http://dx.doi.org/10.1002/gepi.20211>, doi: [10.1002/gepi.20211](https://doi.org/10.1002/gepi.20211).

- 1146 **Veraart J**, Novikov DS, Christiaens D, Ades-Aron B, Sijbers J, Fieremans E. Denoising of diffusion MRI using  
1147 random matrix theory. *NeuroImage*. 2016; 142:394–406.
- 1148 **Wakana S**, Caprihan A, Panzenboeck MM, Fallon JH, Perry M, Gollub RL, Hua K, Zhang J, Jiang H, Dubey P,  
1149 Blitz A, van Zijl P, Mori S. Reproducibility of quantitative tractography methods applied to cerebral white  
1150 matter. *NeuroImage*. 2007 Jul; 36(3):630–644. <http://dx.doi.org/10.1016/j.neuroimage.2007.02.049>, doi:  
1151 [10.1016/j.neuroimage.2007.02.049](https://doi.org/10.1016/j.neuroimage.2007.02.049).
- 1152 **Wandell BA**. Clarifying Human White Matter. *Annual review of neuroscience*. 2016; 39(1):103–128. <https://doi.org/10.1146/annurev-neuro-070815-013815>, doi: 10.1146/annurev-neuro-070815-013815.
- 1154 **Ward-Fear G**, Pauly GB, Vendetti JE, Shine R. Authorship Protocols Must Change to Credit Citizen Scientists.  
1155 *Trends Ecol Evol*. 2020 Mar; 35(3):187–190.
- 1156 **Wargnier-Dauchelle V**, Grenier T, Durand-Dubief F, Cotton F, Sdika M. A More Interpretable Classifier For  
1157 Multiple Sclerosis. In: *2021 IEEE 18th International Symposium on Biomedical Imaging (ISBI)*; 2021. p. 1062–  
1158 1066. <http://dx.doi.org/10.1109/ISBI48211.2021.9434074>, doi: [10.1109/ISBI48211.2021.9434074](https://doi.org/10.1109/ISBI48211.2021.9434074).
- 1159 **Waskom ML**. seaborn: statistical data visualization. *Journal of Open Source Software*. 2021; 6(60):3021. <https://doi.org/10.21105/joss.03021>, doi: [10.21105/joss.03021](https://doi.org/10.21105/joss.03021).
- 1161 **Wilson G**, Bryan J, Cranston K, Kitzes J, Nederbragt L, Teal TK. Good enough practices in scientific computing.  
1162 *PLoS computational biology*. 2017 Jun; 13(6):e1005510. <http://dx.doi.org/10.1371/journal.pcbi.1005510>, doi:  
1163 [10.1371/journal.pcbi.1005510](https://doi.org/10.1371/journal.pcbi.1005510).
- 1164 **Yeatman JD**, Dougherty RF, Myall NJ, Wandell BA, Feldman HM. Tract Profiles of White Matter Properties:  
1165 Automating Fiber-Tract Quantification. *PLoS one*. 2012 Nov; 7(11):e49790. [https://journals.plos.org/plosone/](https://journals.plos.org/plosone/article?id=10.1371/journal.pone.0049790)  
1166 [article?id=10.1371/journal.pone.0049790](https://doi.org/10.1371/journal.pone.0049790), doi: [10.1371/journal.pone.0049790](https://doi.org/10.1371/journal.pone.0049790).
- 1167 **Yeatman JD**, Richie-Halford A, Smith JK, Keshavan A, Rokem A. A browser-based tool for visualization and  
1168 analysis of diffusion MRI data. *Nature communications*. 2018 Mar; 9(1):940. [https://www.nature.com/articles/](https://www.nature.com/articles/s41467-018-03297-7)  
1169 [s41467-018-03297-7](https://doi.org/10.1038/s41467-018-03297-7), doi: [10.1038/s41467-018-03297-7](https://doi.org/10.1038/s41467-018-03297-7).
- 1170 **Yeatman JD**, Wandell BA, Mezer AA. Lifespan maturation and degeneration of human brain white mat-  
1171 ter. *Nature communications*. 2014 Sep; 5:4932. <https://www.nature.com/articles/ncomms5932>, doi:  
1172 [10.1038/ncomms5932](https://doi.org/10.1038/ncomms5932).
- 1173 **Yeh CH**, Jones DK, Liang X, Descoteaux M, Connelly A. Mapping Structural Connectivity Using Diffusion MRI:  
1174 Challenges and Opportunities. *Journal of magnetic resonance imaging: JMRI*. 2020 Jun; [http://dx.doi.org/10.](http://dx.doi.org/10.1002/jmri.27188)  
1175 [1002/jmri.27188](https://doi.org/10.1002/jmri.27188), doi: [10.1002/jmri.27188](https://doi.org/10.1002/jmri.27188).
- 1176 **Yeh FC**, Zaydan IM, Suski VR, Lacomis D, Richardson RM, Maroon JC, Barrios-Martinez J. Differential tractography  
1177 as a track-based biomarker for neuronal injury. *NeuroImage*. 2019 Nov; 202:116131. [http://dx.doi.org/10.](http://dx.doi.org/10.1016/j.neuroimage.2019.116131)  
1178 [1016/j.neuroimage.2019.116131](https://doi.org/10.1016/j.neuroimage.2019.116131), doi: [10.1016/j.neuroimage.2019.116131](https://doi.org/10.1016/j.neuroimage.2019.116131).
- 1179 **Yendiki A**, Koldewyn K, Kakunoori S, Kanwisher N, Fischl B. Spurious group differences due to head motion in  
1180 a diffusion MRI study. *NeuroImage*. 2014 Mar; 88:79–90. <http://dx.doi.org/10.1016/j.neuroimage.2013.11.027>,  
1181 doi: [10.1016/j.neuroimage.2013.11.027](https://doi.org/10.1016/j.neuroimage.2013.11.027).
- 1182 **Zech JR**, Badgeley MA, Liu M, Costa AB, Titano JJ, Oermann EK. Variable generalization performance of a deep  
1183 learning model to detect pneumonia in chest radiographs: A cross-sectional study. *PLoS Med*. 2018 Nov;  
1184 15(11):e1002683.
- 1185 **Zhang Y**, Brady M, Smith S. Segmentation of brain MR images through a hidden Markov random field model  
1186 and the expectation-maximization algorithm. *IEEE Transactions on Medical Imaging*. 2001; 20(1):45–57. doi:  
1187 [10.1109/42.906424](https://doi.org/10.1109/42.906424).
- 1188 **Zunair H**, Rahman A, Mohammed N, Cohen JP. Uniformizing Techniques to Process CT Scans with 3D CNNs  
1189 for Tuberculosis Prediction. In: *Predictive Intelligence in Medicine* Springer International Publishing; 2020. p.  
1190 156–168. [http://dx.doi.org/10.1007/978-3-030-59354-4\\_15](http://dx.doi.org/10.1007/978-3-030-59354-4_15), doi: [10.1007/978-3-030-59354-4\\_15](https://doi.org/10.1007/978-3-030-59354-4_15).

## 1191 Appendix 1

### 1192 CuBIDS variant annotation

1193 We identified 20 unique dMRI acquisitions across HBN-POD2, which are summarized in Ta-  
 1194 ble 1. Site CBIC has two acquisition types: “64dir,” which shares it’s pulse sequence with sites  
 1195 RU and CUNY, and “ABCD64dir,” with acquisition parameters that better match the ABCD  
 1196 study (TE=0.089 s and TR=4.1 s). The “Most\_Common” variant identifies the most common  
 1197 combination of acquisition parameters for a given site and acquisition. The “Low\_Volume”  
 1198 variant identifies participants from all sites with less than 129 DWI volumes, which is the  
 1199 number of volumes in the most common variants. All remaining variants names identify  
 1200 the acquisition parameter(s) that differ from those of the most common variant. For exam-  
 1201 ple, the “MultibandAccelerationFactor” variant has a different multiband acceleration factor  
 1202 than that of the the most common variant but all participants within that variant share the  
 1203 same multiband acceleration factor. Variants that differ by multiple acquisition parame-  
 1204 ters have names that are composed of concatenated parameters. For example, the variant  
 1205 “Dim3SizeVoxelSizeDim3” varies both in the number of voxels in dimension 3 (“Dim3Size”)  
 1206 and in the voxel size in dimension 3 (“VoxelSizeDim3”).

| Site      | Acquisition      | Variant                        | Count |
|-----------|------------------|--------------------------------|-------|
| CBIC      | 64dir            | Most_Common                    | 828   |
| CBIC      | 64dir            | Obliquity                      | 32    |
| CBIC      | 64dir            | VoxelSizeDim1VoxelSizeDim2     | 1     |
| CBIC      | ABCD64dir        | Most_Common                    | 15    |
| CBIC      | ABCD64dir        | HasFmap                        | 2     |
| CBIC      | ABCD64dir        | MultibandAccelerationFactor    | 1     |
| CBIC      | ABCD64dir        | Obliquity                      | 1     |
| CUNY      | 64dir            | Most_Common                    | 68    |
| CUNY      | 64dir            | Dim3SizeVoxelSizeDim3          | 4     |
| 1207 CUNY | 64dir            | Obliquity                      | 2     |
| RU        | 64dir            | Most_Common                    | 859   |
| RU        | 64dir            | NoFmap                         | 5     |
| RU        | 64dir            | Obliquity                      | 8     |
| RU        | 64dir            | PhaseEncodingDirection         | 1     |
| SI        | 64dir            | EchoTime                       | 1     |
| SI        | 64dir            | EchoTimePhaseEncodingDirection | 9     |
| SI        | 64dir            | Most_Common                    | 269   |
| SI        | 64dir            | NoFmap                         | 2     |
| SI        | 64dir            | Obliquity                      | 12    |
| All Sites | All Acquisitions | Low_Volume_Count               | 14    |

1208 **Appendix 1 Table 1.** Participant counts for HBN-POD2 variants.

1210 **Appendix 2**

1211  
1212  
1213  
1214  
1215  
1216

### HBN-POD2 quality control instruments

We created quality control web applications for both community raters and expert raters. These apps are publicly accessible at <https://fibr.dev>, for the community science instrument and at <http://www.nipreps.org/dmriprep-viewer/> for the expert rating instrument. We encourage readers to try these web applications on their own but have included screenshots and a summary of the interfaces in Figure 1.

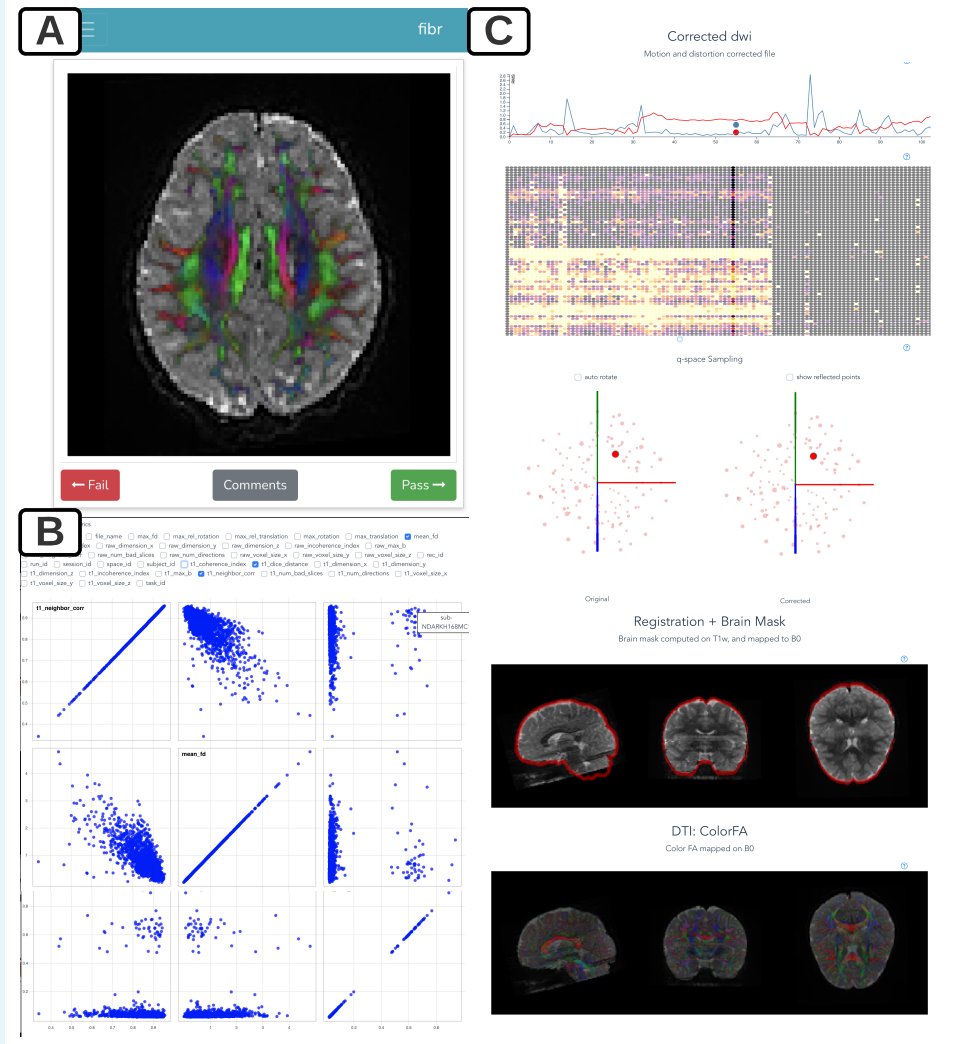

1217  
1218  
1219  
1220  
1221  
1222  
1223  
1224  
1226

**Appendix 2 Figure 1. HBN-POD2 quality control instruments:** (A) The user interface for community science QC app *Fibr*. After a tutorial, users are asked to give binary pass/fail ratings to each subject's DEC-FA image. The intuitive swipe or click interface allows community scientists to review more images than is practical for expert reviewers. Expert reviewers use the more advanced *dmriprep-viewer* interface, where they can (B) view the distribution of data quality metrics for the entire study using interactive scatterplots and violin plots, and (C) inspect individual participants' preprocessing results, including corrected dMRI images, frame displacement, q-space sampling distributions, registration information, and a DTI model.



1227 **Appendix 3**

1228 **XGB feature importance**

1229 SHAP is a method to explain individual predictions based on game theoretically optimal  
 1230 Shapley values (*Lundberg and Lee, 2017*). To estimate global feature importance for the  
 1231 XGB and XGB-q models, we use the `shap` library's `TreeExplainer` (*Lundberg et al., 2020*) and  
 1232 average the absolute Shapley value per feature across each individual prediction. Tables 1  
 1233 and 2 list the *QSIPrep* automated QC metric features in order of decreasing mean absolute  
 1234 shap value for the XGB and XGB-q models, respectively. We chose the top three metrics  
 1235 from Table 1 to plot metric distributions in Figure 2 and correlations with the expert QC  
 1236 results in Figure 3.

| feature               | mean abs shap | feature               | mean abs shap |
|-----------------------|---------------|-----------------------|---------------|
| raw_neighbor_corr     | 0.666429      | raw_neighbor_corr     | 0.767536      |
| max_rel_translation   | 0.348662      | raw_incoherence_index | 0.453897      |
| raw_num_bad_slices    | 0.288937      | raw_num_bad_slices    | 0.430422      |
| t1_neighbor_corr      | 0.282198      | t1_coherence_index    | 0.382218      |
| raw_incoherence_index | 0.229733      | max_rel_translation   | 0.363052      |
| raw_coherence_index   | 0.162103      | raw_coherence_index   | 0.320438      |
| max_rel_rotation      | 0.118963      | t1_neighbor_corr      | 0.250948      |
| mean_fd               | 0.116457      | t1_dice_distance      | 0.248104      |
| max_fd                | 0.099359      | t1_incoherence_index  | 0.242348      |
| max_rotation          | 0.078774      | max_rel_rotation      | 0.135590      |
| t1_coherence_index    | 0.035553      | mean_fd               | 0.128642      |
| t1_dice_distance      | 0.034510      | max_translation       | 0.120815      |
| max_translation       | 0.032323      | max_fd                | 0.119739      |
| t1_incoherence_index  | 0.030225      | max_rotation          | 0.101209      |
| raw_voxel_size_x      | 0.000000      | t1_num_bad_slices     | 0.007075      |
| raw_voxel_size_y      | 0.000000      | raw_dimension_y       | 0.000000      |
| raw_voxel_size_z      | 0.000000      | raw_dimension_z       | 0.000000      |
| raw_num_directions    | 0.000000      | raw_voxel_size_x      | 0.000000      |
| raw_max_b             | 0.000000      | raw_voxel_size_y      | 0.000000      |
| raw_dimension_y       | 0.000000      | raw_voxel_size_z      | 0.000000      |
| raw_dimension_z       | 0.000000      | raw_max_b             | 0.000000      |
| t1_voxel_size_x       | 0.000000      | t1_voxel_size_x       | 0.000000      |
| t1_dimension_x        | 0.000000      | raw_num_directions    | 0.000000      |
| t1_dimension_y        | 0.000000      | t1_dimension_x        | 0.000000      |
| t1_dimension_z        | 0.000000      | t1_dimension_y        | 0.000000      |
| t1_voxel_size_y       | 0.000000      | t1_dimension_z        | 0.000000      |
| t1_voxel_size_z       | 0.000000      | t1_voxel_size_y       | 0.000000      |
| t1_max_b              | 0.000000      | t1_voxel_size_z       | 0.000000      |
| t1_num_bad_slices     | 0.000000      | t1_max_b              | 0.000000      |
| t1_num_directions     | 0.000000      | t1_num_directions     | 0.000000      |
| raw_dimension_x       | 0.000000      | raw_dimension_x       | 0.000000      |

1238 **Appendix 3 Table 1.** XGB mean absolute shap  
 1240 values

**Appendix 3 Table 2.** XGB-q mean absolute shap  
 values

1241 **Appendix 4**

1242 **The *Fibr* Community Science Consortium**

1243 The following community raters provided > 3,000 ratings each and elected to be included  
1244 in the *Fibr* Community Science Consortium as co-authors on this paper.

| Name                       | ORCID iD            |
|----------------------------|---------------------|
| Nicholas J. Abbott         | 0000-0003-1466-0352 |
| John A. E. Anderson        | 0000-0001-6511-1957 |
| Gagana B.                  |                     |
| MaryLena Bleile            | 0000-0002-0762-2596 |
| Peter S. Bloomfield        | 0000-0002-8356-7701 |
| Vince Bottom               |                     |
| Josiane Bourque            |                     |
| Rory Boyle                 | 0000-0003-0787-6892 |
| Julia K. Brynildsen        | 0000-0002-1627-6576 |
| Navona Calarco             | 0000-0002-4391-0472 |
| Jaime J. Castellon         | 0000-0001-5834-7101 |
| Natasha Chaku              | 0000-0003-0944-6159 |
| Bosi Chen                  | 0000-0002-0117-9757 |
| Sidhant Chopra             | 0000-0003-0866-3477 |
| Emily B. J. Coffey         | 0000-0001-8249-7396 |
| Nigel Colenbier            | 0000-0003-0928-2668 |
| Daniel J. Cox              |                     |
| James Elliott Crippen      |                     |
| Jacob J. Crouse            | 0000-0002-3805-2936 |
| Szabolcs David             | 0000-0003-0316-3895 |
| Benjamin De Leener         | 0000-0002-1378-2756 |
| Gwyneth Delap              |                     |
| Zhi-De Deng                | 0000-0001-8925-0871 |
| Jules Roger Dugre          | 0000-0003-4946-0350 |
| Anders Eklund              | 0000-0001-7061-7995 |
| Kirsten Ellis              | 0000-0002-7570-0939 |
| Arielle Ered               | 0000-0002-8386-4423 |
| Harry Farmer               | 0000-0002-3684-0605 |
| Joshua Faskowitz           | 0000-0003-1814-7206 |
| Jody E. Finch              | 0000-0003-2457-1345 |
| Guillaume Flandin          | 0000-0003-0077-7859 |
| Matthew W. Flounders       | 0000-0001-7014-4665 |
| Leon Fonville              | 0000-0001-8874-7843 |
| Dea Garic                  | 0000-0003-3595-4210 |
| Patricia Garrido-Vásquez   | 0000-0002-9561-8983 |
| Gabriel Gonzalez-Escamilla | 0000-0002-7209-1736 |
| Shannon E. Grogans         | 0000-0003-0383-4601 |
| Mareike Grotheer           | 0000-0002-8653-1157 |
| David C. Gruskin           | 0000-0001-6504-191X |
| Guido I. Guberman          |                     |
| Edda Briana Haggerty       | 0000-0003-0597-7956 |

|                         |                     |
|-------------------------|---------------------|
| Younghee Hahn           |                     |
| Elizabeth H. Hall       |                     |
| Jamie L. Hanson         | 0000-0002-0469-8886 |
| Yann Harel              | 0000-0002-8970-1983 |
| Bruno Hebling Vieira    | 0000-0002-8770-7396 |
| Meike D. Hettwer        | 0000-0002-7973-6752 |
| Corey Horien            | 0000-0001-6738-1029 |
| Fan Huang               |                     |
| Zeeshan M. Huque        |                     |
| Anthony R. James        | 0000-0002-5297-2229 |
| Isabella Kahhale        | 0000-0002-0963-9738 |
| Sarah L. H. Kamhout     |                     |
| Arielle S. Keller       | 0000-0003-4708-1672 |
| Harmandeep Singh Khara  | 0000-0001-6840-4616 |
| Gregory Kiar            | 0000-0001-8915-496X |
| Peter Alexander Kirk    | 0000-0003-0786-3039 |
| Simon H. Kohl           | 0000-0003-0949-6754 |
| Stephanie A. Korenic    |                     |
| Cole Korponay           | 0000-0003-2562-9617 |
| Alyssa K. Kozlowski     |                     |
| Nevena Kraljevic        | 0000-0003-0869-648X |
| Alberto Lazari          | 0000-0002-8688-581X |
| Mackenzie J. Leavitt    | 0000-0002-6100-3235 |
| Zhaolong Li             | 0000-0003-2246-4116 |
| Giulia Liberati         | 0000-0002-5684-4443 |
| Elizabeth S. Lorenc     | 0000-0003-1311-726X |
| Annabelle Julina Lossin | 0000-0001-5921-1353 |
| Leon D. Lotter          | 0000-0002-2337-6073 |
| David M. Lydon-Staley   | 0000-0001-8702-3923 |
| Christopher R. Madan    | 0000-0003-3228-6501 |
| Neville Magielse        | 0000-0002-6777-4225 |
| Hilary A. Marusak       | 0000-0002-0771-6795 |
| Julien Mayor            | 0000-0001-9827-542  |
| Amanda L. McGowan       | 0000-0003-3422-0135 |
| Kahini P. Mehta         |                     |
| Steven Lee Meisler      | 0000-0002-8888-1572 |
| Cleanthis Michael       | 0000-0002-5300-473X |
| Mackenzie E. Mitchell   | 0000-0002-0225-6320 |
| Simon Morand-Beaulieu   | 0000-0002-5880-3688 |
| Benjamin T. Newman      | 0000-0002-0668-2853 |
| Jared A. Nielsen        | 0000-0002-2717-193X |
| Shane M. O'Mara         |                     |
| Amar Ojha               | 0000-0002-1038-0225 |
| Adam Omary              |                     |
| Evren Özarlan           | 0000-0003-0859-1311 |
| Linden Parkes           | 0000-0002-9329-7207 |
| Madeline Peterson       |                     |
| Adam Robert Pines       |                     |
| Claudia Pisanu          | 0000-0002-9151-4319 |

|                            |                     |
|----------------------------|---------------------|
| Ryan R. Rich               | 0000-0001-9495-3184 |
| Ashish K. Sahoo            | 0000-0003-1815-6655 |
| Amjad Samara               | 0000-0002-6001-7395 |
| Farah Sayed                |                     |
| Jonathan Thore Schneider   | 0000-0002-1925-6669 |
| Lindsay S. Shaffer         | 0000-0002-0642-1717 |
| Ekaterina Shatalina        | 0000-0001-8900-0792 |
| Sara A. Sims               | 0000-0001-7107-1891 |
| Skyler Sinclair            | 0000-0003-3010-6431 |
| Jae W. Song                | 0000-0002-3127-6427 |
| Griffin Stockton Hogrogian | 0000-0003-2877-078X |
| Ursula A. Tooley           | 0000-0001-6377-3885 |
| Vaibhav Tripathi           |                     |
| Hamid B. Turker            | 0000-0002-2670-4036 |
| Sofie Louise Valk          | 0000-0003-2998-6849 |
| Matthew B. Wall            | 0000-0002-0493-6274 |
| Cheryl K. Walther          |                     |
| Yuchao Wang                | 0000-0001-9871-3006 |
| Bertil Wegmann             | 0000-0003-2193-6003 |
| Thomas Welton              | 0000-0002-9503-2093 |
| Alex I. Wiesman            | 0000-0003-0917-1570 |
| Andrew G. Wiesman          |                     |
| Mark Wiesman               |                     |
| Drew E. Winters            | 0000-0002-0701-9658 |
| Ruiyi Yuan                 |                     |
| Sadie J. Zacharek          | 0000-0001-8770-4614 |
| Chris Zajner               | 0000-0002-0204-6497 |
| Ilya Zakharov              | 0000-0001-7207-9641 |
| Gianpaolo Zammarchi        | 0000-0002-9733-380X |
| Dale Zhou                  | 0000-0001-9240-1327 |
| Benjamin Zimmerman         | 0000-0003-2570-8198 |
| Kurt Zoner                 |                     |

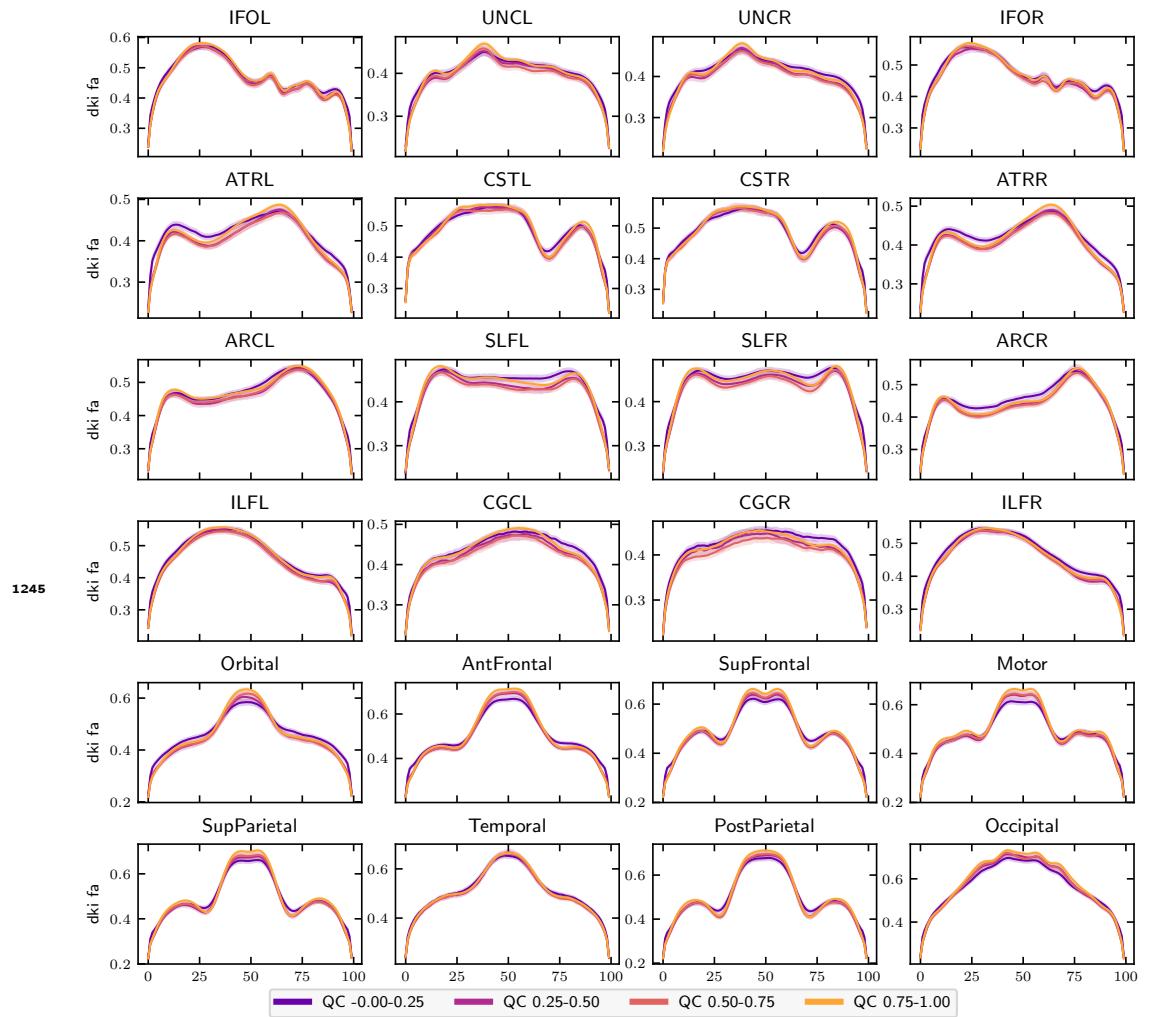

**Figure 8-Figure supplement 1. FA bundle profiles binned by QC score:** FA profiles binned by QC score in twenty-four major white matter bundles. The *x*-axis represents distance along the length of the fiber bundle. Error bands represent bootstrapped 95% confidence intervals. Bundle abbreviations are as in Figure 8



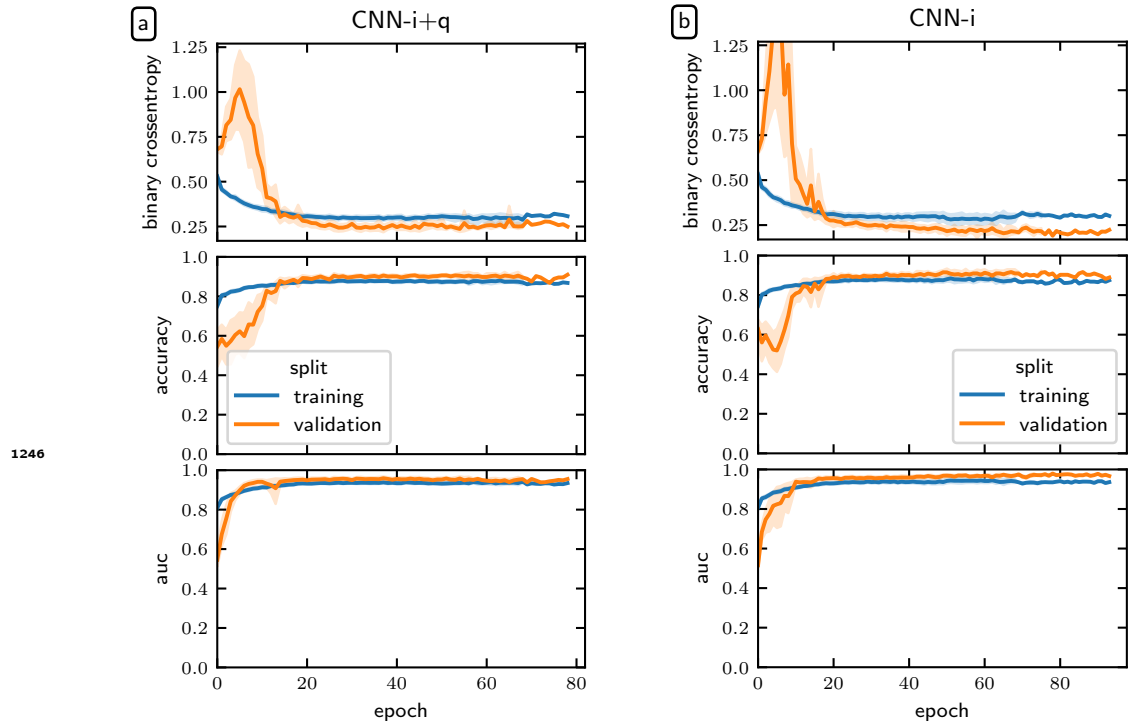

**Figure 10-Figure supplement 1. Deep learning model loss curves:** The binary cross-entropy loss (top), accuracy (middle), and ROC-AUC (bottom) for **(a)** the CNN-i+q model and **(a)** the CNN-i model. Model performance typically plateaued after twenty epochs but was allowed continue until meeting the early stopping criterion. The error bands represent a bootstrapped 95% confidence interval.
